# Supplementary material for: Photocurable acylhydrazone covalent adaptable networks with fast dynamic exchange and tunable viscoelastic properties
Source: Royal Society of Chemistry journal article supplement (doi:10.1039/d4py00230j), 2024-01-01
Supplement: d4py00230j1.pdf [file d4py00230j1.pdf]

**Supporting information:**

## **Photocurable acylhydrazone covalent adaptable networks with fast dynamic exchange and tunable viscoelastic properties**

Yunsheng Xu<sup>a</sup>, Chonglin Liu<sup>a</sup>, Yanying Zhao<sup>b</sup>, Xianming Zhang<sup>a,\*</sup> and Minna Hakkarainen<sup>c,\*</sup>

<sup>a</sup> School of Materials Science and Engineering, Zhejiang Sci-Tech University, Hangzhou 310018, China

<sup>b</sup> School of Chemistry and Chemical Engineering, Zhejiang Sci-Tech University, Hangzhou 310018, China

<sup>c</sup> Department of Fibre and Polymer Technology, KTH Royal Institute of Technology, Teknikringen 58, 100 44 Stockholm, Sweden

Correspondence: Xianming Zhang, Email: zhangxm@zstu.edu.cn

Minna Hakkarainen, Email: minna@kth.se

This supporting information contains 26 figures and 4 tables on 47 pages.

## 1. Synthesis small molecules for model reactions:

Compound b: vanillin (1.50 g, 10 mmol) and acetyl hydrazine (0.74 g, 10 mmol) were dissolved in 20 ml ethanol, and 4-5 drops of acetic acid were added. The mixture was stirred for 3 h at room temperature. After the reaction, the powder was filtered under reduced pressure and washed with ethanol to obtain a white solid powder. The crude product was recrystallized with ethanol:water =1:1 (v/v) and characterized by  $^1\text{H}$  nuclear magnetic resonance ( $^1\text{H}$  NMR) spectroscopy. All samples were dissolved in  $\text{DMSO-d}_6$  for  $^1\text{H}$  NMR characterization. Compounds a, c and d were obtained and characterized by following the same protocol

## 2. $^1\text{H}$ NMR characterization

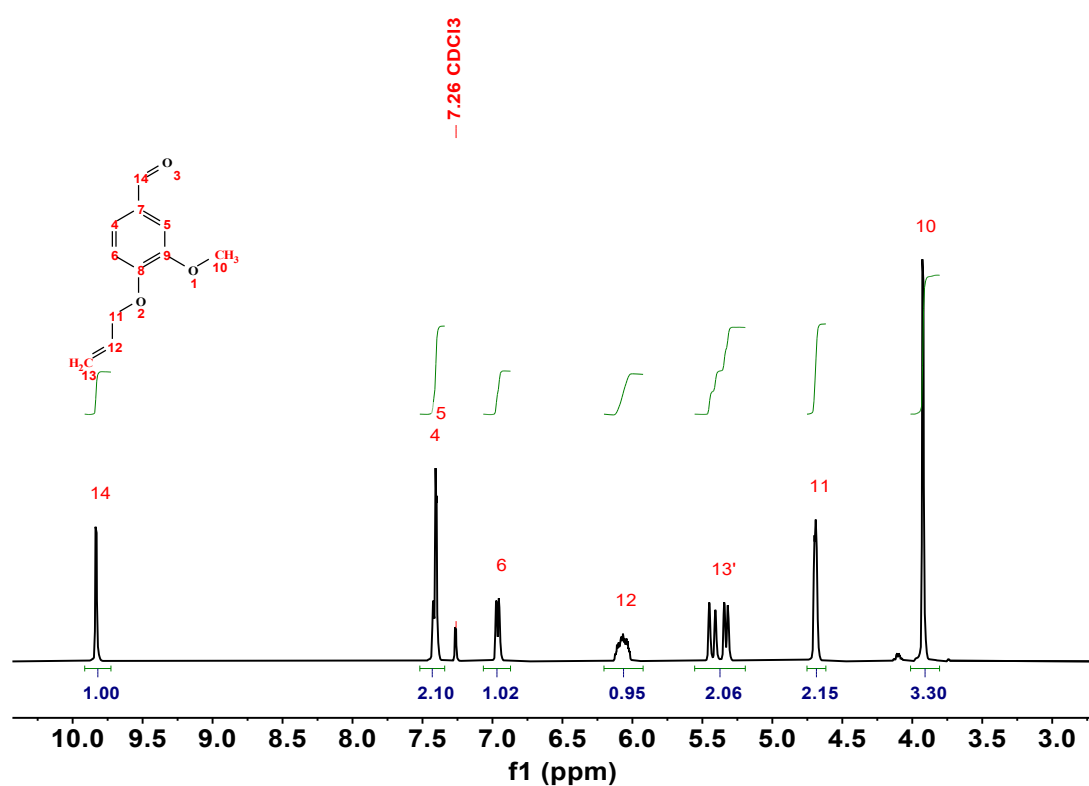

Figure S1.  $^1\text{H}$  NMR spectrum of AVL.

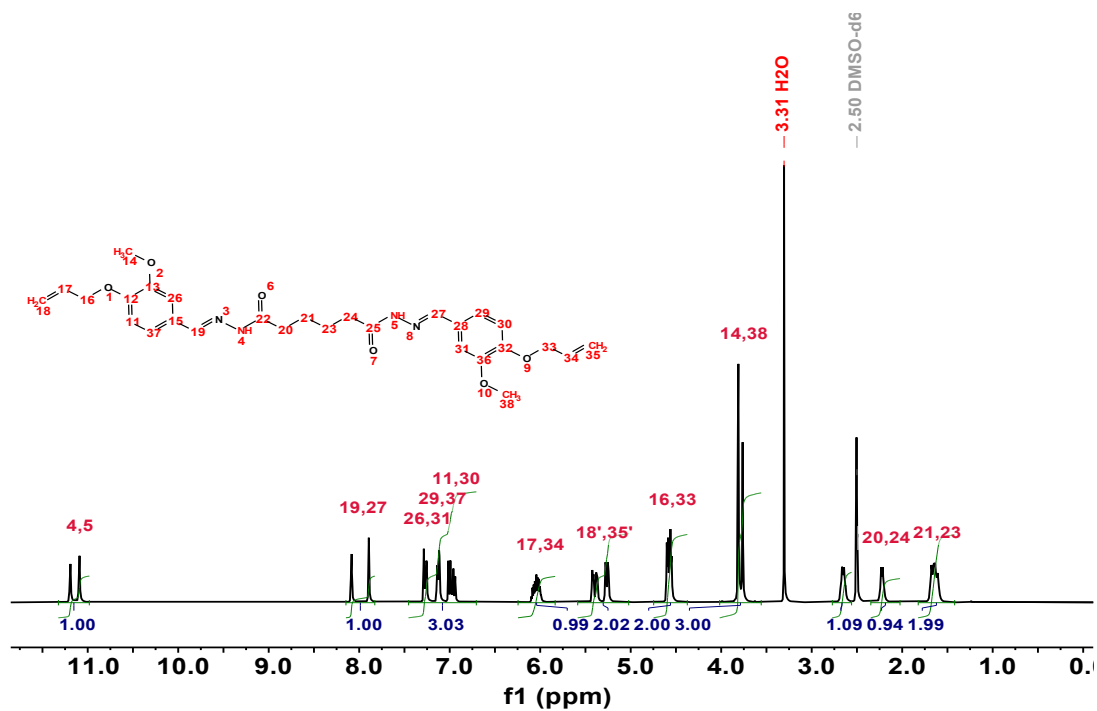

Figure S2. <sup>1</sup>H NMR spectrum of AVH.

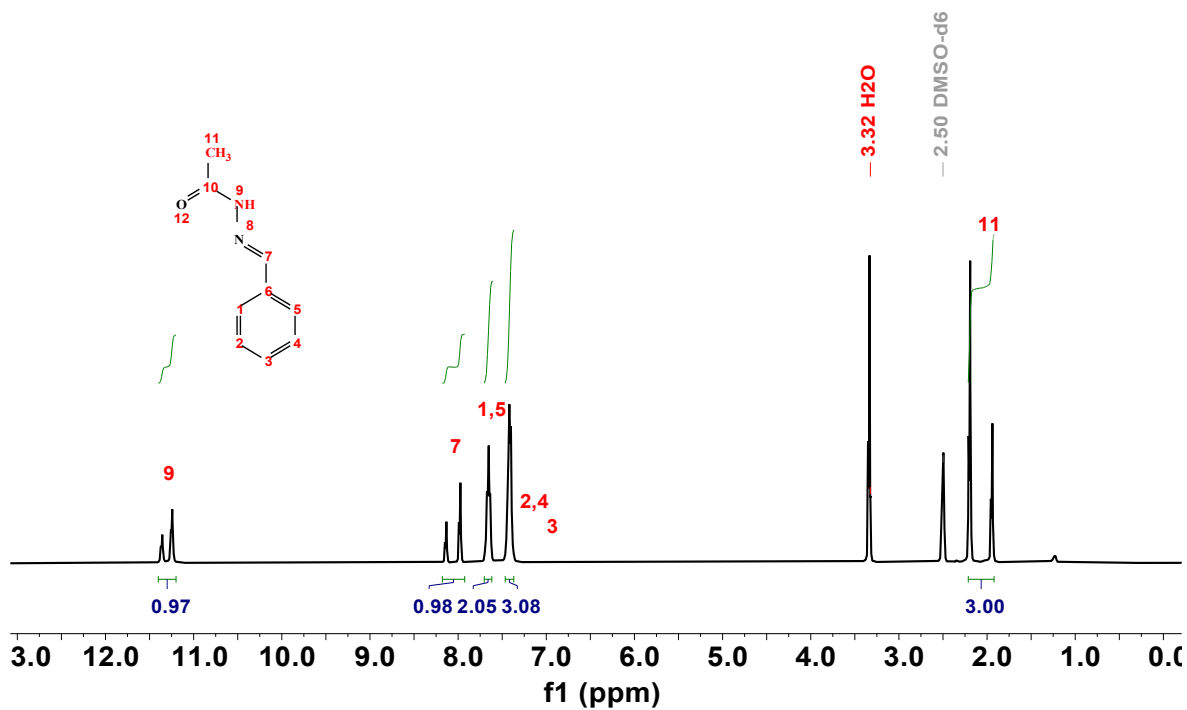

Figure S3. <sup>1</sup>H NMR spectrum of compound a.

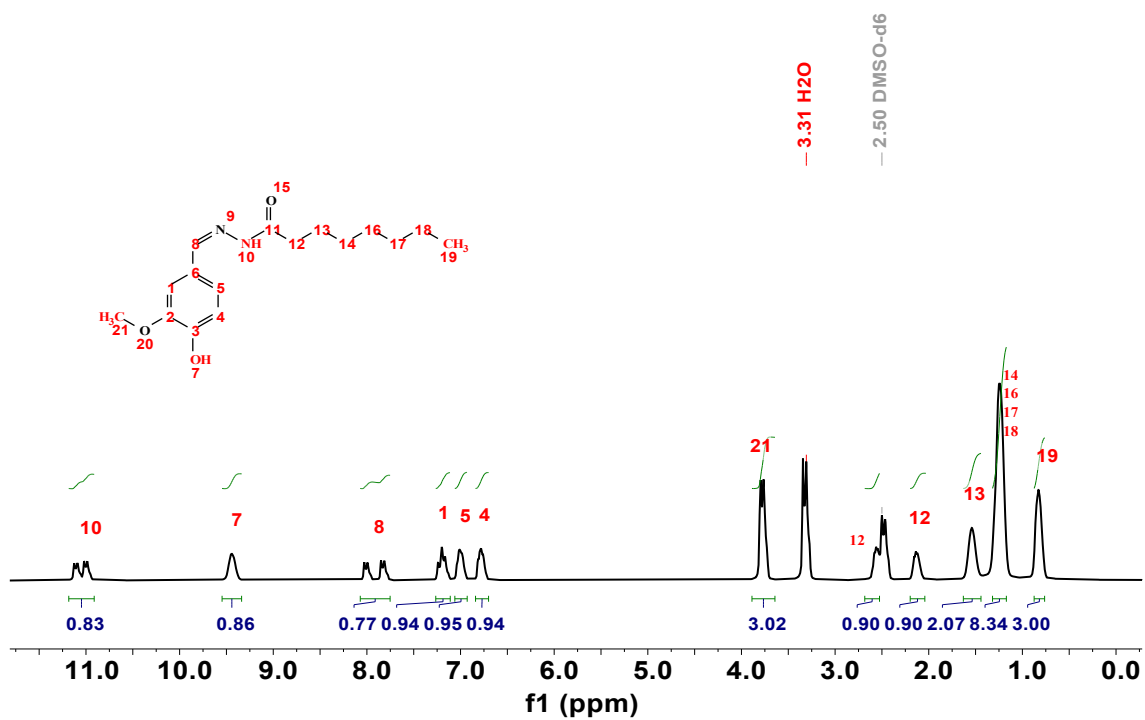

Figure S4. <sup>1</sup>H NMR spectrum of compound b.

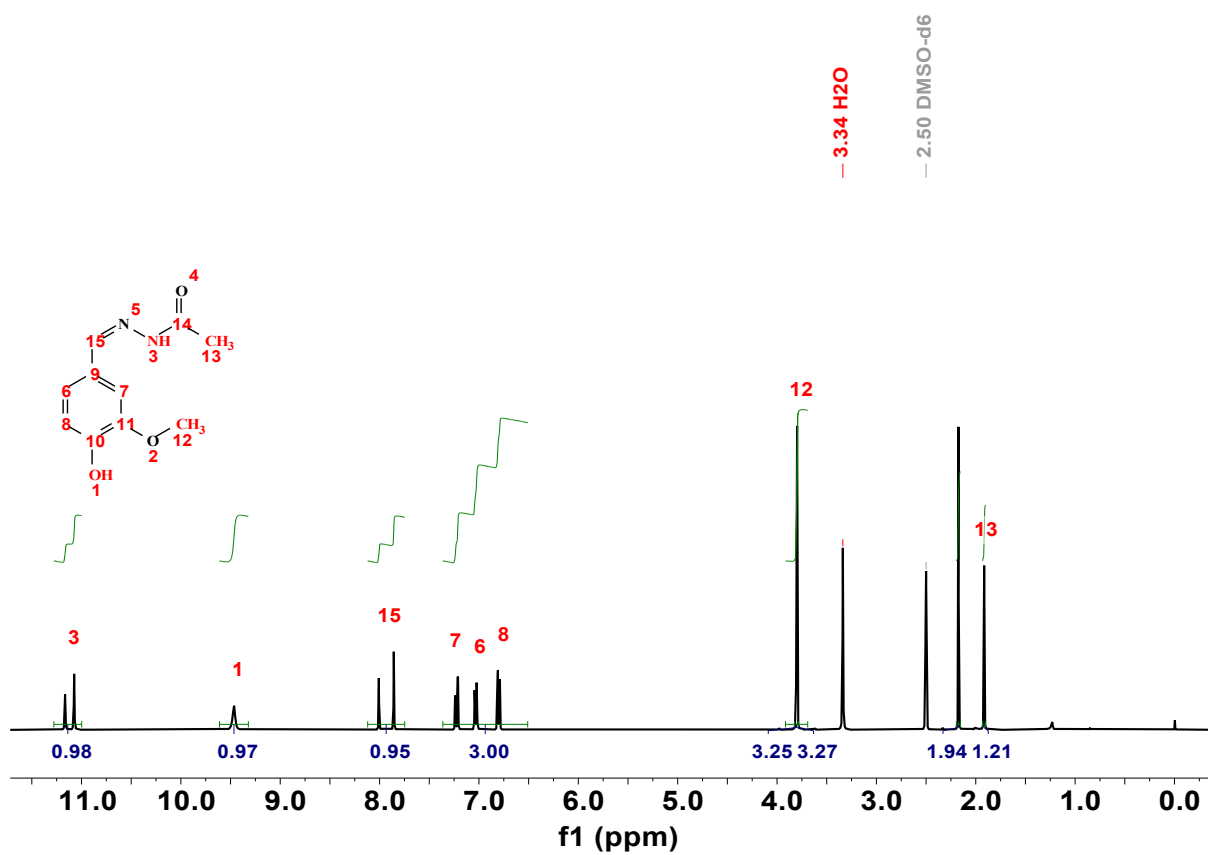

Figure S5. <sup>1</sup>H NMR spectrum of compound c.

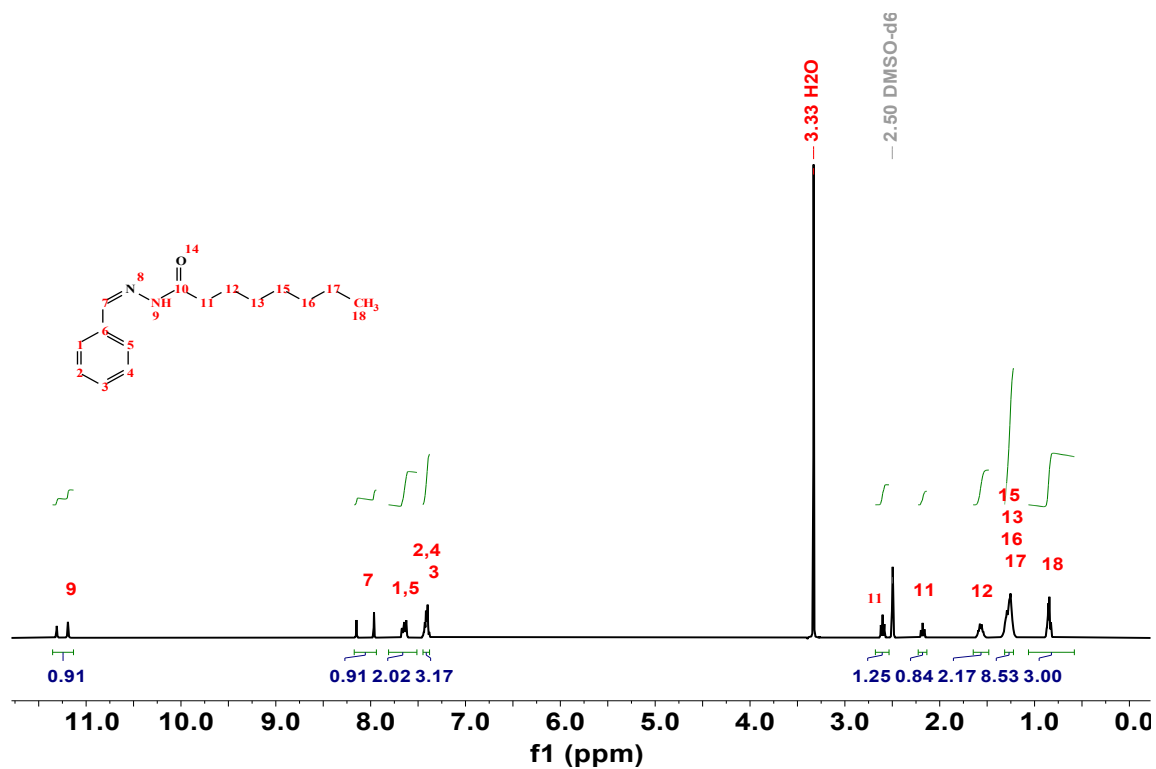

Figure S6. <sup>1</sup>H NMR spectrum of compound d.

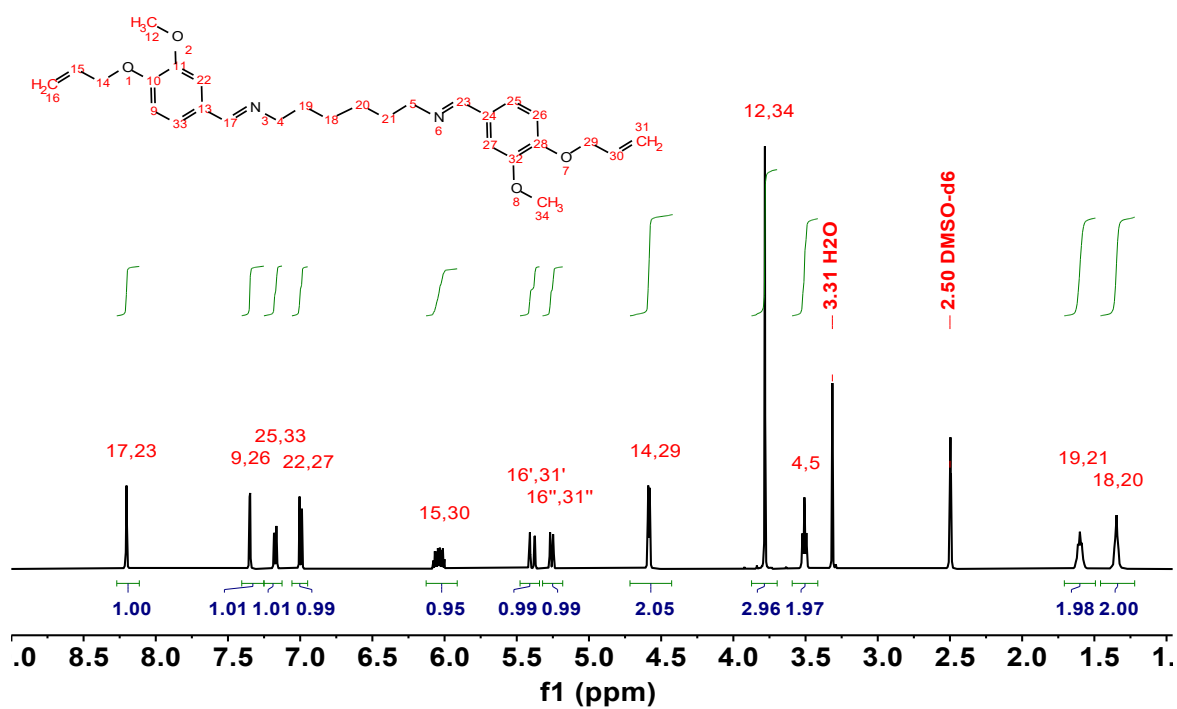

Figure S7. <sup>1</sup>H NMR spectrum of SVH.

## 2. The presence of AD influence on the thiol-ene model reaction

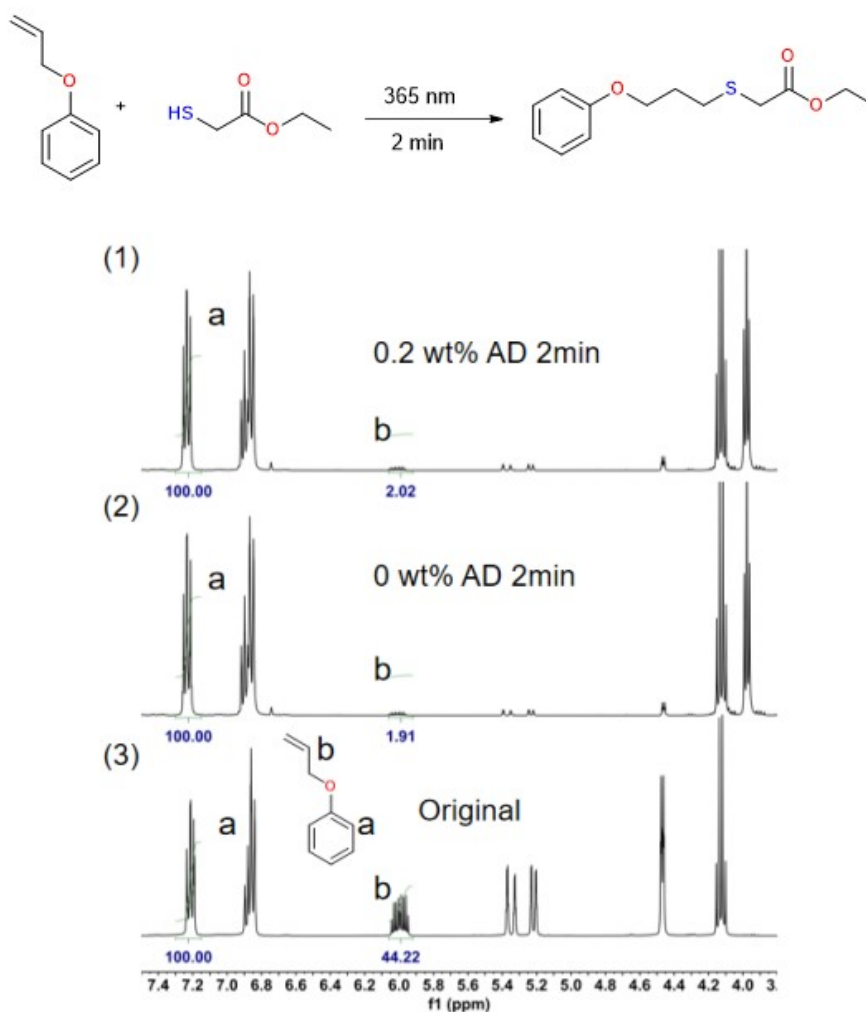

Figure S8. Comparison of <sup>1</sup>H NMR spectra of components with and without catalyst before and after photocuring (in the figure, a and b are proton peaks on the double bond of allyl phenyl ether and benzene ring respectively, and the peaks on benzene ring are used as reference).

### 3. GC-MS test

Figure S9. Mass spectra of model compounds a-d.

Figure S10. Mass spectrum of catalyst AD.

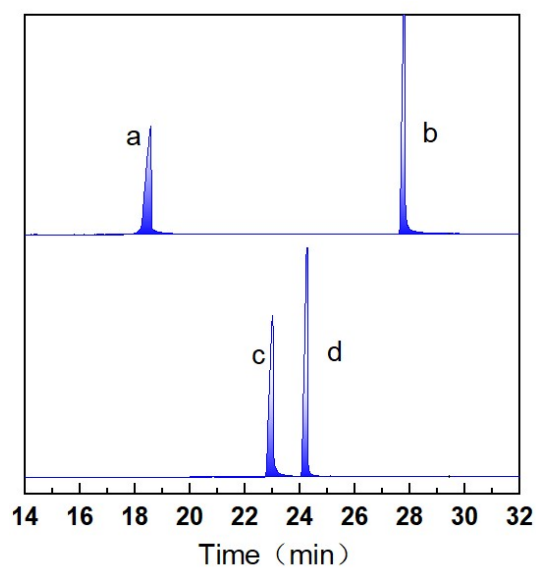

Figure S11. Gas chromatography of model compound reference material

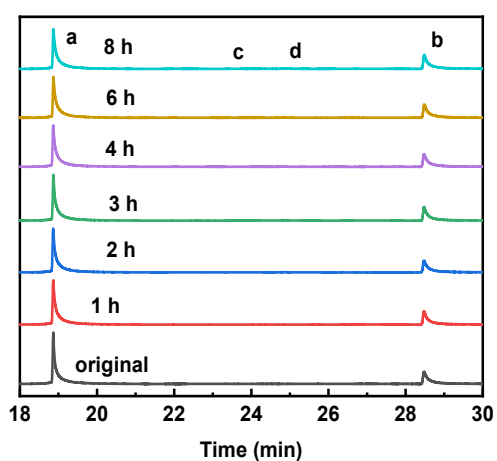

Figure S12. Gas chromatogram of acylhydrazone fractions a and b after exchange at different time at 160 °C.

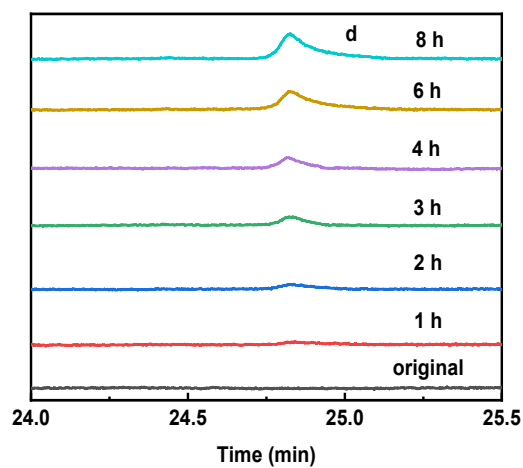

Figure S13. Magnified figure of peak position of c and d gas chromatographic products.

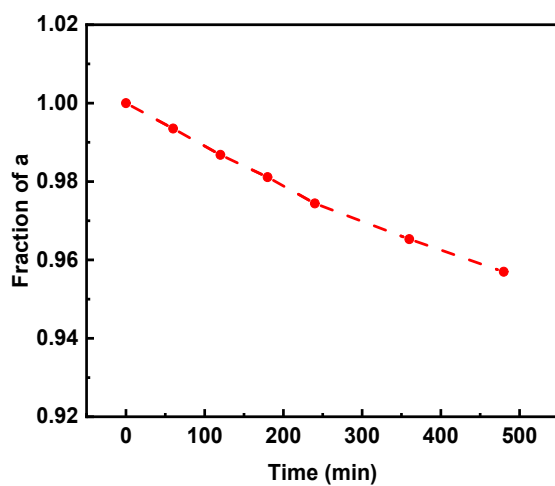

Figure S14. Reaction fraction of compound a

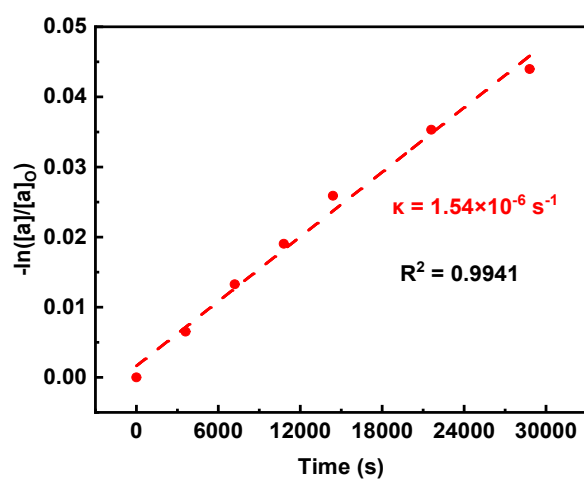

Figure S15. Pseudo-first order kinetics of acylhydrazone exchange.



#### 4. Infrared spectra

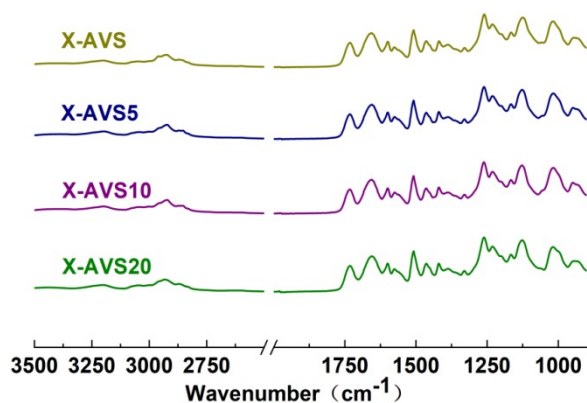

Figure S16. ATR-FTIR spectra of different loadings of AD acylhydrazone resins after UV curing

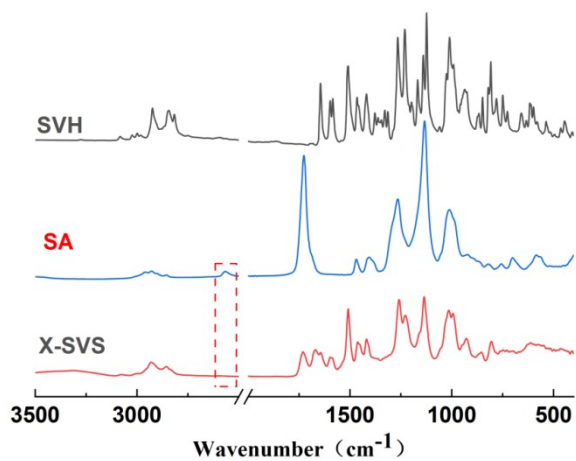

Figure S17. ATR-FTIR spectra of schiff base resins before and after UV curing

#### 5. Reprocessability of acylhydrazone CANs

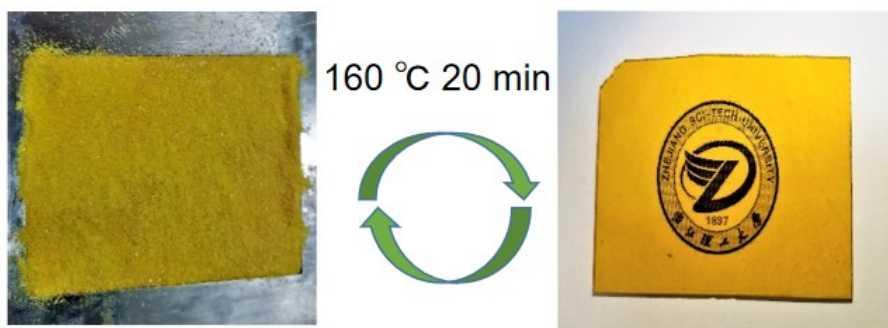

Figure S18. Illustration of the thermal reprocessing of X-AVS

#### 6. Tensile properties

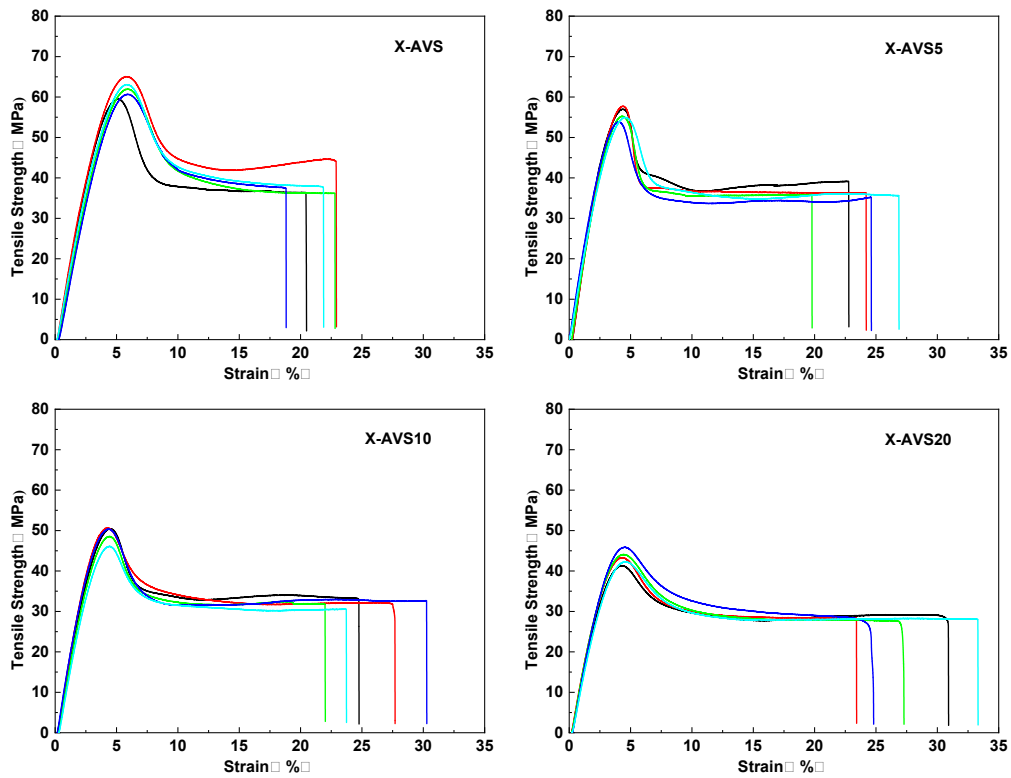

Figure S19. The tensile testing curves of the different CANs including five replicates for each material.

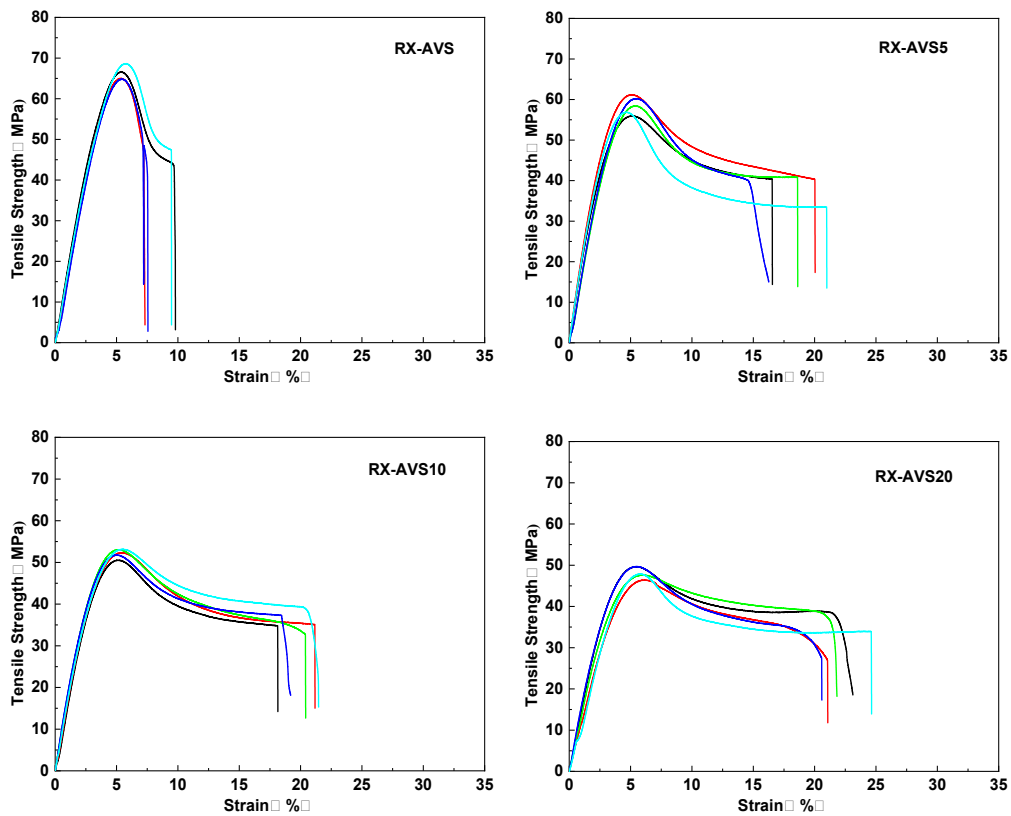

Figure S20. The tensile testing curves of the different CANs after reprocessing including five replicates for each material.

### 7. Stoichiometric comparison

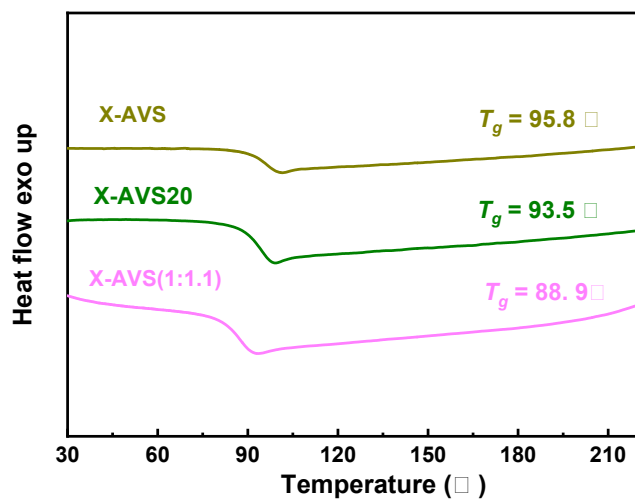

Figure S21. DSC test of hydrazone materials with different stoichiometric ratios

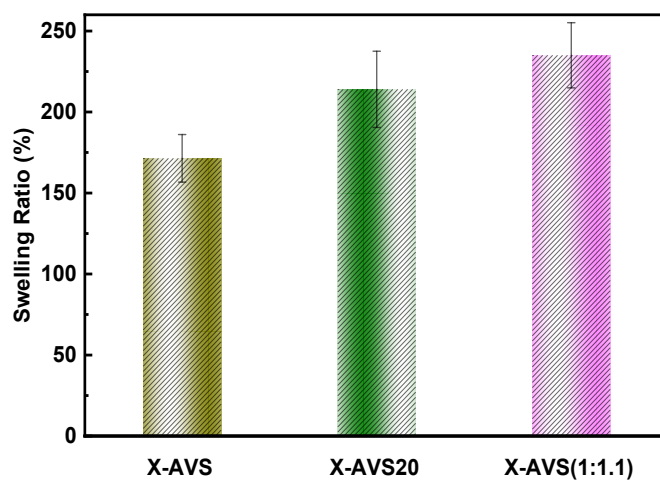

Figure S22. Swelling ratios of different catalyst loads and different stoichiometric ratios

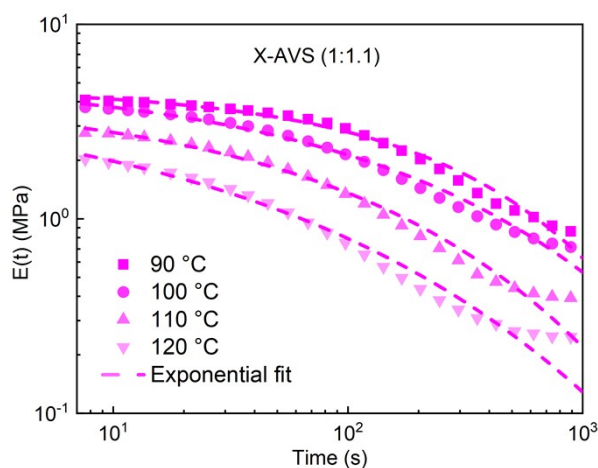

Figure S23. The stretched exponential to the stress relaxation data of acylhydrazone CANs with different stoichiometric ratios.

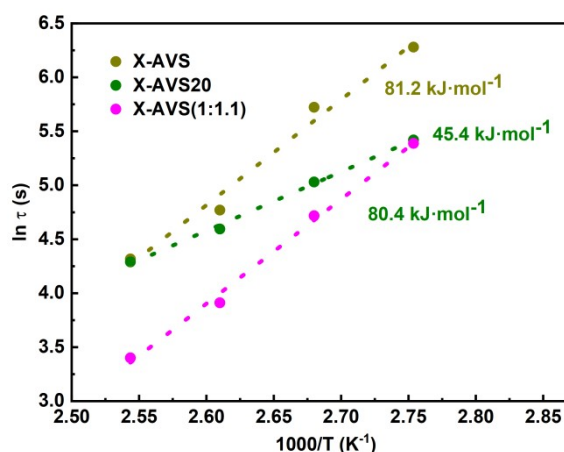

Figure S24. The relaxation time ( $\tau$ ) of acylhydrazone CANs as a function of  $1000/T$ .

## 8. Calculation details of activation energy

Double Maxwell model: 
$$G(t) = G_0 \cdot e^{-\left(\frac{t}{\tau}\right)^\beta} \quad (S1)$$

X-AVS:  $y=9.77x-20.6$ ,  $E_a = 81.2 \text{ kJ}\cdot\text{mol}^{-1}$ ,  $R^2=0.983$

X-AVS5:  $y=6.86x-12.6$ ,  $E_a = 57.0 \text{ kJ}\cdot\text{mol}^{-1}$ ,  $R^2=0.997$

X-AVS10:  $y=5.73x-10.0$ ,  $E_a = 47.6 \text{ kJ}\cdot\text{mol}^{-1}$ ,  $R^2=0.998$

X-AVS20:  $y=5.47x-9.6$ ,  $E_a = 45.4 \text{ kJ}\cdot\text{mol}^{-1}$ ,  $R^2=0.997$

X-AVS(1:1.1):  $y=9.67x-21.2$ ,  $E_a = 80.4 \text{ kJ}\cdot\text{mol}^{-1}$ ,  $R^2=0.995$

## 9. Creep test

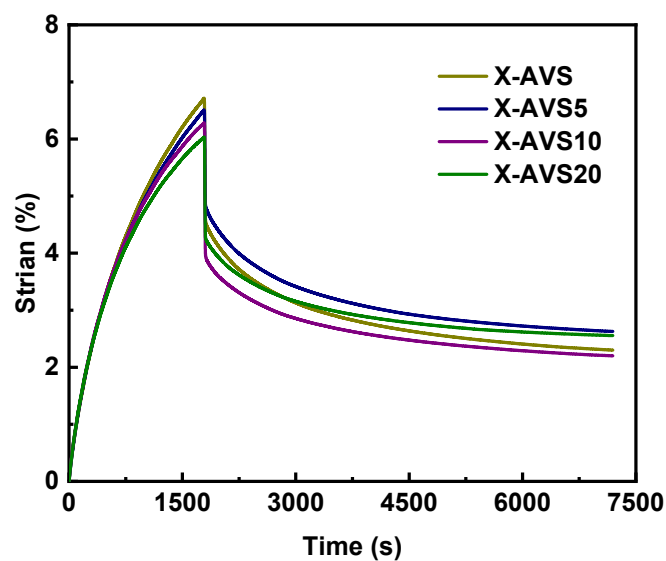

Figure S25. The creep curves of acylhydrazone CANs under different catalyst loadings at 100 °C.

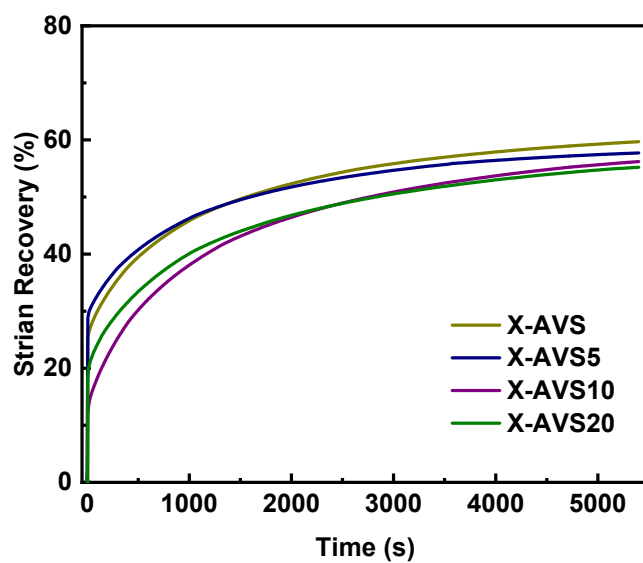

Figure S26. The strain recovery curves of acylhydrazone CANs under different catalyst loadings at 70 °C

## 10. GC-MS analysis date

Table S1 GC-MS retention times, peak height and peak areas.

| Group      | Peak # | Retention time min | Peak height % | Corrected area % |
|------------|--------|--------------------|---------------|------------------|
| 0.2 wt% AD | ---    | -----              | -----         | -----            |
|            | 1      | 18.543             | 1896053       | 216109773        |
|            | 2      | 22.785             | 499259        | 28026965         |
|            | 3      | 24.147             | 1655989       | 69490773         |
|            | 4      | 27.783             | 4842435       | 299246160        |
| 0 wt% AD   | ---    | -----              | -----         | -----            |
|            | 1      | 18.561             | 2041390       | 256102246        |
|            | 2      | 22.78              | 100189        | 10182719         |
|            | 3      | 24.125             | 902246        | 33366878         |
|            | 4      | 27.801             | 5350630       | 365414547        |

## 11. Mechanical properties after reprocessing

Table S2 Comparison of tensile properties before and after reprocessing.

| sample   | Young's modulus (MPa) | Tensile strength (MPa) | Elongation at break (%) |
|----------|-----------------------|------------------------|-------------------------|
| X-AVS    | 1620±27               | 62.1±2.1               | 21.4±1.7                |
| RX-AVS   | 1630±32               | 66.2±1.7               | 8.6±1.1                 |
| X-AVS5   | 1850±89               | 55.8±1.6               | 23.7±2.6                |
| RX-AVS5  | 1610±21               | 58.5±2.2               | 18.5±2.1                |
| X-AVS10  | 1620±41               | 49.2±1.9               | 25.7±2.3                |
| RX-AVS10 | 1620±25               | 52.2±1.1               | 20.1±1.4                |
| X-AVS20  | 1560±39               | 43.4±1.7               | 27.9±4.0                |
| RX-AVS20 | 1520±40               | 48.3±1.4               | 22.3±1.6                |

## 12. Transition state geometry

Table S3 Transition state geometry.

|                                                                                     |                                                                                      |
|-------------------------------------------------------------------------------------|--------------------------------------------------------------------------------------|
| 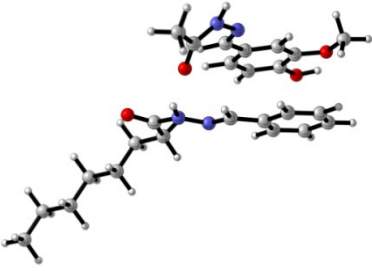   |    |
| 1-1                                                                                 | ts1-2                                                                                |
|   |   |
| 1-3                                                                                 | ts1-4                                                                                |
|  |  |
| 2-1                                                                                 | 2-2                                                                                  |
|  |  |
| 2-3                                                                                 | 2-4                                                                                  |

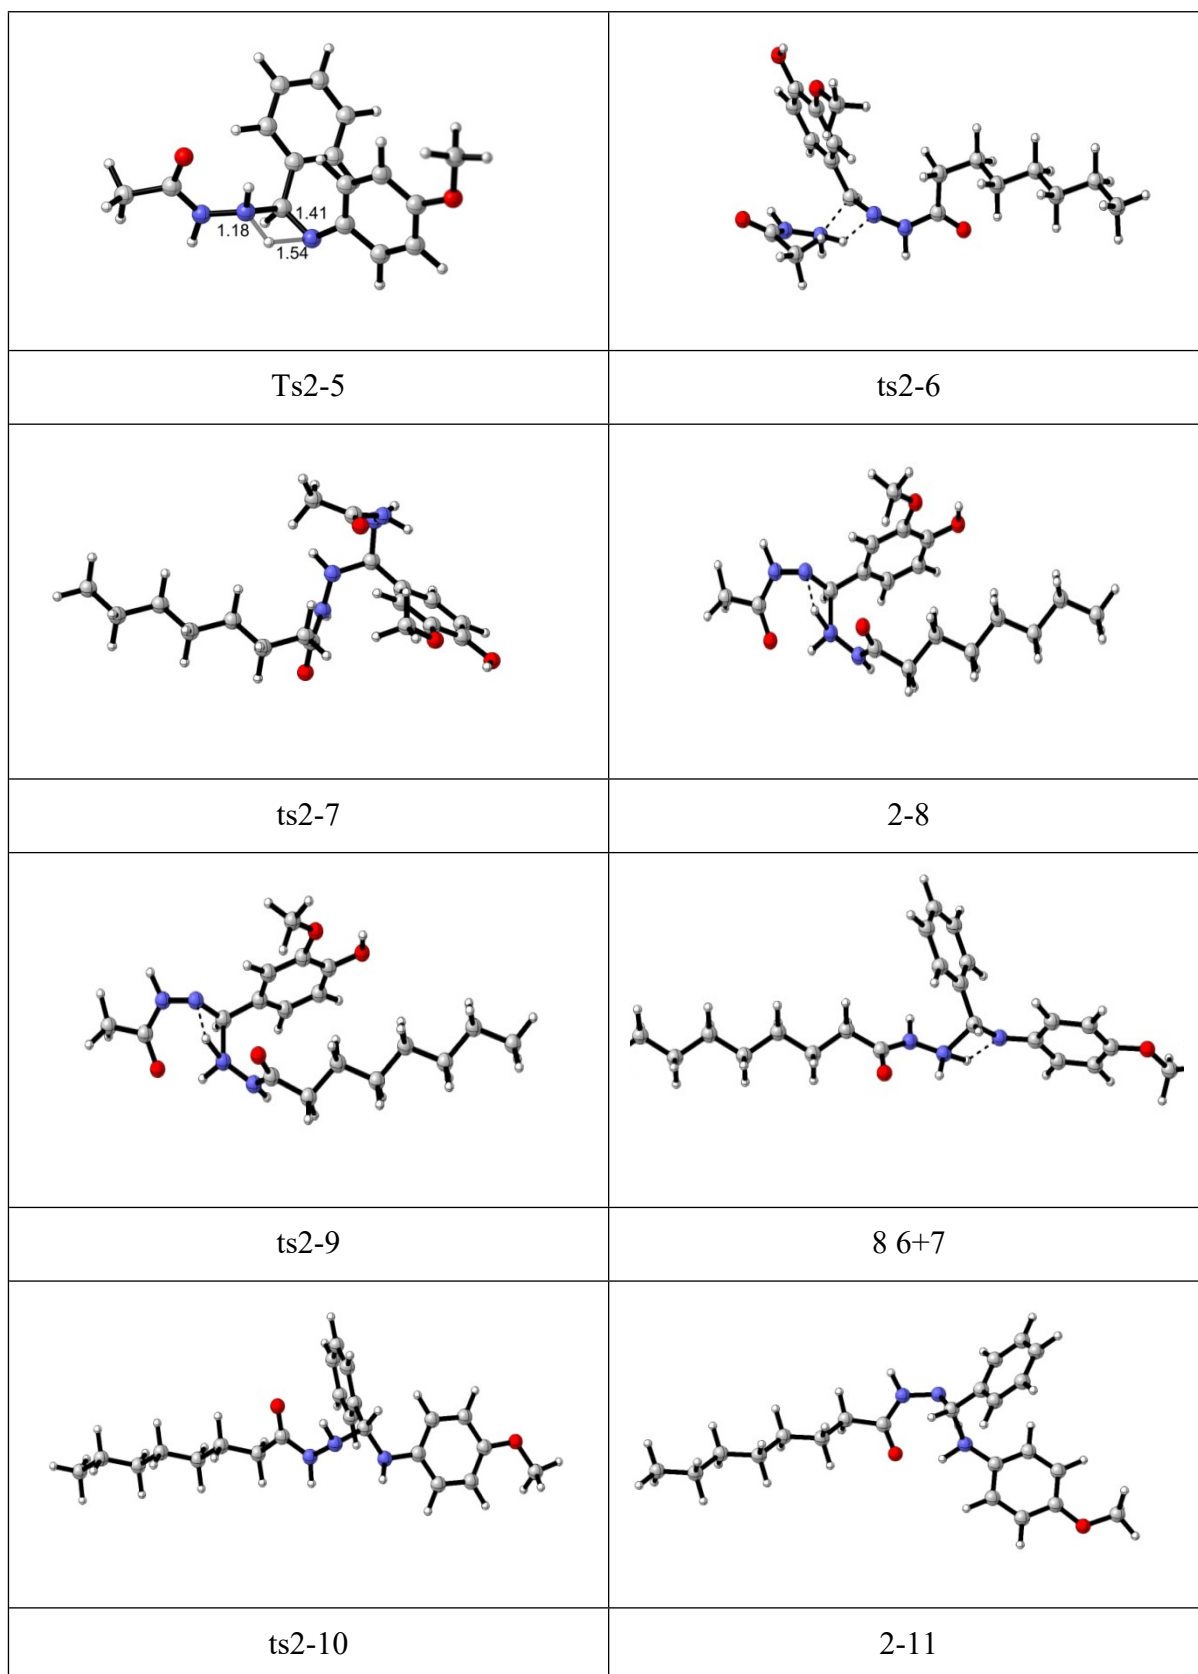



Table S4. Cartesian Coordinates of all Calculated Structures

| Structure  |          | Cartesian coordinates |           |           |
|------------|----------|-----------------------|-----------|-----------|
|            |          | x                     | y         | z         |
| <b>1+2</b> | C        | -4.029541             | 0.009290  | 0.000043  |
|            | C        | -3.374488             | -1.212527 | 0.000000  |
|            | C        | -1.987192             | -1.253265 | -0.000030 |
|            | C        | -1.243678             | -0.075764 | -0.000016 |
|            | C        | -1.910405             | 1.150814  | 0.000015  |
|            | C        | -3.292781             | 1.190239  | 0.000048  |
|            | H        | -5.111254             | 0.045343  | 0.000068  |
|            | H        | -3.941790             | -2.134064 | -0.000008 |
|            | H        | -1.471267             | -2.206295 | -0.000063 |
|            | H        | -1.328130             | 2.062512  | 0.000020  |
|            | H        | -3.803853             | 2.144411  | 0.000077  |
|            | C        | 0.223200              | -0.172757 | -0.000053 |
|            | H        | 0.662485              | -1.163392 | -0.000082 |
|            | N        | 0.920927              | 0.894262  | -0.000055 |
|            | N        | 2.282336              | 0.854115  | -0.000084 |
|            | C        | 3.138675              | -0.214690 | -0.000006 |
|            | H        | 2.682050              | 1.776032  | -0.000088 |
|            | O        | 2.777437              | -1.370980 | 0.000030  |
|            | C        | 4.602321              | 0.165144  | 0.000076  |
|            | H        | 4.777940              | 1.239264  | -0.000341 |
| H          | 5.067264 | -0.276387             | 0.880268  |           |
| H          | 5.067551 | -0.277136             | -0.879584 |           |
| <b>1-1</b> | C        | -8.974652             | -1.459856 | -0.041945 |
|            | C        | -7.804083             | -1.643762 | -0.999257 |
|            | H        | -9.901139             | -1.858236 | -0.456595 |
|            | H        | -8.785464             | -1.968806 | 0.905365  |
|            | H        | -9.133496             | -0.402289 | 0.177777  |
|            | C        | -6.497109             | -1.092442 | -0.442712 |
|            | H        | -7.677710             | -2.706295 | -1.227606 |
|            | H        | -8.024690             | -1.150340 | -1.950288 |

|   |           |           |           |
|---|-----------|-----------|-----------|
| C | -5.316575 | -1.268120 | -1.389190 |
| H | -6.621846 | -0.028293 | -0.215489 |
| H | -6.274763 | -1.584279 | 0.510841  |
| H | -5.189566 | -2.332713 | -1.615866 |
| H | -5.540333 | -0.775901 | -2.341321 |
| C | -4.014495 | -0.707482 | -0.832534 |
| C | -2.835510 | -0.894382 | -1.780932 |
| H | -3.789042 | -1.192603 | 0.124226  |
| H | -4.138800 | 0.358942  | -0.626666 |
| C | -1.541799 | -0.314102 | -1.230435 |
| H | -2.691741 | -1.961217 | -1.973752 |
| H | -3.062332 | -0.420067 | -2.737935 |
| H | -0.673963 | -0.629776 | -1.818011 |
| H | -1.352025 | -0.659136 | -0.210845 |
| C | -1.548125 | 1.202449  | -1.243869 |
| O | -2.382176 | 1.868663  | -1.815446 |
| N | -0.521006 | 1.816130  | -0.575189 |
| H | -0.507419 | 2.831920  | -0.567882 |
| C | 2.612166  | 0.515868  | -1.042570 |
| C | 2.326908  | -0.851553 | -0.979510 |
| C | 3.602919  | 0.972327  | -1.892804 |
| C | 3.036227  | -1.736683 | -1.762131 |
| H | 1.534155  | -1.184799 | -0.322739 |
| C | 4.327520  | 0.079541  | -2.678808 |
| H | 3.814264  | 2.033212  | -1.951569 |
| C | 4.049489  | -1.269990 | -2.617613 |
| H | 5.103736  | 0.417559  | -3.351906 |
| O | 4.740710  | -2.145142 | -3.383555 |
| H | 4.392904  | -3.030278 | -3.215655 |
| O | 2.846867  | -3.086316 | -1.804974 |
| C | 1.816486  | -3.619306 | -1.000036 |
| H | 1.807527  | -4.690418 | -1.181027 |
| H | 2.010034  | -3.426768 | 0.058309  |
| H | 0.848385  | -3.191216 | -1.272667 |

|   |           |           |           |
|---|-----------|-----------|-----------|
| N | 0.447132  | 1.120507  | 0.103495  |
| C | 1.858991  | 1.457797  | -0.162905 |
| H | 1.979792  | 2.495502  | -0.487735 |
| C | -1.269088 | -1.436148 | 4.090090  |
| C | -1.853764 | -0.196998 | 3.873451  |
| C | -1.212740 | 0.741435  | 3.075218  |
| C | 0.007167  | 0.442264  | 2.479692  |
| C | 0.589699  | -0.802971 | 2.699362  |
| C | -0.043963 | -1.735930 | 3.505330  |
| H | -1.763512 | -2.166551 | 4.717310  |
| H | -2.805915 | 0.041745  | 4.329015  |
| H | -1.665067 | 1.712245  | 2.907062  |
| H | 1.545632  | -1.021833 | 2.239401  |
| H | 0.416554  | -2.699850 | 3.681169  |
| C | 0.631295  | 1.428468  | 1.541444  |
| H | 0.322298  | 2.452793  | 1.770114  |
| N | 2.083907  | 1.312340  | 1.303634  |
| N | 2.930879  | 2.202227  | 1.932703  |
| C | 2.814179  | 3.559968  | 1.863492  |
| H | 3.689262  | 1.784554  | 2.444673  |
| O | 1.927272  | 4.108902  | 1.241118  |
| C | 3.867904  | 4.330650  | 2.619860  |
| H | 4.389190  | 4.976727  | 1.915120  |
| H | 3.367565  | 4.966984  | 3.348121  |
| H | 4.588390  | 3.693466  | 3.129107  |

---

**ts1-2**

---

|   |           |           |           |
|---|-----------|-----------|-----------|
| C | -8.361150 | -0.724440 | 0.872660  |
| C | -7.519660 | -0.736250 | -0.396980 |
| H | -9.407310 | -0.951010 | 0.664890  |
| H | -7.993870 | -1.462460 | 1.588800  |
| H | -8.319250 | 0.253600  | 1.356140  |
| C | -6.053400 | -0.418480 | -0.131340 |
| H | -7.593920 | -1.715080 | -0.880340 |
| H | -7.919320 | -0.010820 | -1.111550 |

|   |           |           |           |
|---|-----------|-----------|-----------|
| C | -5.194700 | -0.426240 | -1.389470 |
| H | -5.977850 | 0.562150  | 0.351110  |
| H | -5.652200 | -1.143540 | 0.586280  |
| H | -5.259870 | -1.409760 | -1.867790 |
| H | -5.597490 | 0.293640  | -2.109210 |
| C | -3.735290 | -0.092060 | -1.112070 |
| C | -2.861000 | -0.121690 | -2.360140 |
| H | -3.334590 | -0.800570 | -0.377200 |
| H | -3.676600 | 0.903240  | -0.657510 |
| C | -1.418610 | 0.258270  | -2.052330 |
| H | -2.881200 | -1.123130 | -2.796950 |
| H | -3.259890 | 0.569630  | -3.104620 |
| H | -0.773370 | 0.080180  | -2.919240 |
| H | -1.016470 | -0.350100 | -1.240170 |
| C | -1.296700 | 1.736000  | -1.724640 |
| O | -2.042790 | 2.574540  | -2.173960 |
| N | -0.268890 | 2.112420  | -0.893180 |
| H | -0.060260 | 3.098180  | -0.752100 |
| C | 2.504430  | -0.229240 | -1.196200 |
| C | 2.293260  | -1.331050 | -0.345530 |
| C | 3.449110  | -0.319940 | -2.219690 |
| C | 3.017410  | -2.477840 | -0.534350 |
| H | 1.569130  | -1.260220 | 0.451740  |
| C | 4.197650  | -1.472570 | -2.395590 |
| H | 3.600860  | 0.524480  | -2.880220 |
| C | 3.985450  | -2.553400 | -1.561540 |
| H | 4.939130  | -1.557290 | -3.177900 |
| O | 4.690370  | -3.684450 | -1.724500 |
| H | 4.409570  | -4.316040 | -1.048030 |
| O | 2.908960  | -3.615810 | 0.199590  |
| C | 2.070500  | -3.566250 | 1.340980  |
| H | 2.138450  | -4.542730 | 1.812300  |
| H | 2.411350  | -2.790670 | 2.029940  |
| H | 1.033950  | -3.362250 | 1.060690  |

|   |           |           |           |
|---|-----------|-----------|-----------|
| N | 0.650260  | 1.237460  | -0.373320 |
| C | 1.732340  | 0.974360  | -1.124930 |
| H | 1.823530  | 1.637390  | -1.983810 |
| C | -1.169560 | -1.717740 | 3.336850  |
| C | -1.830150 | -0.984580 | 2.357740  |
| C | -1.146730 | -0.019270 | 1.634730  |
| C | 0.206820  | 0.220090  | 1.868860  |
| C | 0.857490  | -0.504800 | 2.858300  |
| C | 0.171560  | -1.469890 | 3.588250  |
| H | -1.702100 | -2.469170 | 3.905560  |
| H | -2.881000 | -1.159140 | 2.161530  |
| H | -1.674680 | 0.561670  | 0.887080  |
| H | 1.907350  | -0.303880 | 3.029480  |
| H | 0.689120  | -2.027440 | 4.359680  |
| C | 0.938090  | 1.302700  | 1.081900  |
| H | 0.516840  | 2.268690  | 1.390800  |
| N | 2.376940  | 1.251870  | 1.187190  |
| N | 2.867390  | 2.495110  | 1.544180  |
| C | 2.701980  | 3.622830  | 0.832260  |
| H | 3.548090  | 2.501920  | 2.289060  |
| O | 1.982870  | 3.676520  | -0.167570 |
| C | 3.438330  | 4.841680  | 1.331360  |
| H | 4.069330  | 5.214350  | 0.525090  |
| H | 2.713500  | 5.619260  | 1.570210  |
| H | 4.051230  | 4.641230  | 2.209090  |

---

**1-3**

---

|   |           |           |           |
|---|-----------|-----------|-----------|
| C | -8.459880 | -0.732850 | 0.883970  |
| C | -7.618350 | -0.744850 | -0.385760 |
| H | -9.506080 | -0.959340 | 0.676240  |
| H | -8.092670 | -1.470810 | 1.600220  |
| H | -8.417900 | 0.245260  | 1.367350  |
| C | -6.151950 | -0.427100 | -0.120220 |
| H | -7.692810 | -1.723710 | -0.869010 |
| H | -8.018030 | -0.019420 | -1.100320 |

|   |           |           |           |
|---|-----------|-----------|-----------|
| C | -5.292180 | -0.434440 | -1.377830 |
| H | -6.076560 | 0.553540  | 0.362240  |
| H | -5.750940 | -1.152110 | 0.597590  |
| H | -5.356180 | -1.418040 | -1.856190 |
| H | -5.694840 | 0.285230  | -2.097830 |
| C | -3.833180 | -0.098500 | -1.098770 |
| C | -2.957190 | -0.125240 | -2.345730 |
| H | -3.432310 | -0.807260 | -0.364180 |
| H | -3.775940 | 0.896550  | -0.643580 |
| C | -1.517120 | 0.260680  | -2.038110 |
| H | -2.972430 | -1.127450 | -2.781340 |
| H | -3.358570 | 0.563370  | -3.091290 |
| H | -0.870690 | 0.068310  | -2.900890 |
| H | -1.119890 | -0.341760 | -1.218590 |
| C | -1.396470 | 1.747350  | -1.722370 |
| O | -2.161560 | 2.573880  | -2.162320 |
| N | -0.366330 | 2.123850  | -0.903630 |
| H | -0.115920 | 3.099980  | -0.769160 |
| C | 2.393550  | -0.236160 | -1.225090 |
| C | 2.200120  | -1.313780 | -0.339760 |
| C | 3.353680  | -0.333910 | -2.227990 |
| C | 2.930710  | -2.466680 | -0.512720 |
| H | 1.446550  | -1.250030 | 0.430730  |
| C | 4.115730  | -1.477940 | -2.377840 |
| H | 3.483460  | 0.489760  | -2.918600 |
| C | 3.893190  | -2.552940 | -1.539010 |
| H | 4.859370  | -1.571260 | -3.157000 |
| O | 4.584930  | -3.691550 | -1.710590 |
| H | 4.302460  | -4.321870 | -1.033870 |
| O | 2.809440  | -3.610520 | 0.214070  |
| C | 1.969170  | -3.568510 | 1.353530  |
| H | 2.038230  | -4.547210 | 1.820430  |
| H | 2.307530  | -2.796120 | 2.047210  |
| H | 0.932300  | -3.365360 | 1.073580  |

|   |           |           |           |
|---|-----------|-----------|-----------|
| N | 0.583000  | 1.207330  | -0.495650 |
| C | 1.476830  | 0.875850  | -1.341260 |
| H | 1.505920  | 1.428500  | -2.279750 |
| C | -1.288420 | -1.728810 | 3.343760  |
| C | -1.925960 | -0.985520 | 2.356670  |
| C | -1.222400 | -0.030140 | 1.633780  |
| C | 0.131650  | 0.181000  | 1.893800  |
| C | 0.755780  | -0.559170 | 2.887630  |
| C | 0.055040  | -1.510610 | 3.608130  |
| H | -1.843620 | -2.462520 | 3.913930  |
| H | -2.979850 | -1.138800 | 2.159360  |
| H | -1.733120 | 0.568630  | 0.888460  |
| H | 1.797470  | -0.352610 | 3.090810  |
| H | 0.555010  | -2.070300 | 4.389270  |
| C | 0.938870  | 1.291630  | 1.297400  |
| H | 0.426670  | 2.256840  | 1.357270  |
| N | 2.234110  | 1.248370  | 1.480570  |
| N | 2.819220  | 2.515560  | 1.553850  |
| C | 2.608260  | 3.617250  | 0.821610  |
| H | 3.479920  | 2.581190  | 2.309020  |
| O | 1.876840  | 3.676580  | -0.165600 |
| C | 3.342110  | 4.842730  | 1.318980  |
| H | 3.958690  | 5.233530  | 0.510790  |
| H | 2.601220  | 5.602340  | 1.567050  |
| H | 3.964530  | 4.652370  | 2.191720  |

---

**ts1-4**

---

|   |           |           |           |
|---|-----------|-----------|-----------|
| C | 9.441400  | 0.138030  | 0.964090  |
| C | 8.299300  | 0.901690  | 0.306660  |
| H | 10.397670 | 0.643020  | 0.824070  |
| H | 9.271730  | 0.033250  | 2.037690  |
| H | 9.528970  | -0.866160 | 0.544490  |
| C | 6.951410  | 0.214650  | 0.488610  |
| H | 8.244770  | 1.913120  | 0.720620  |
| H | 8.500460  | 1.018790  | -0.762310 |

|   |           |           |           |
|---|-----------|-----------|-----------|
| C | 5.800070  | 0.967430  | -0.165040 |
| H | 7.003080  | -0.798100 | 0.074620  |
| H | 6.748520  | 0.097110  | 1.559010  |
| H | 5.752900  | 1.982970  | 0.244010  |
| H | 6.000580  | 1.076790  | -1.236030 |
| C | 4.452270  | 0.283060  | 0.022130  |
| C | 3.308250  | 1.056520  | -0.623280 |
| H | 4.251650  | 0.168080  | 1.093670  |
| H | 4.492350  | -0.722240 | -0.405060 |
| C | 1.955620  | 0.381760  | -0.450990 |
| H | 3.256530  | 2.057410  | -0.186920 |
| H | 3.510010  | 1.179410  | -1.689540 |
| H | 1.133930  | 1.061500  | -0.698230 |
| H | 1.797360  | 0.092560  | 0.592730  |
| C | 1.809930  | -0.843660 | -1.333640 |
| O | 2.636450  | -1.200410 | -2.138210 |
| N | 0.645820  | -1.565990 | -1.186810 |
| H | 0.460250  | -2.382240 | -1.763090 |
| C | -1.987790 | 0.620850  | -1.175620 |
| C | -2.977350 | 1.250770  | -0.424170 |
| C | -1.233800 | 1.362650  | -2.072760 |
| C | -3.178140 | 2.611980  | -0.554580 |
| H | -3.562310 | 0.641430  | 0.250530  |
| C | -1.435340 | 2.732390  | -2.206800 |
| H | -0.481190 | 0.873180  | -2.681940 |
| C | -2.401850 | 3.362820  | -1.447540 |
| H | -0.856550 | 3.324010  | -2.903630 |
| O | -2.608110 | 4.695930  | -1.573600 |
| H | -3.329520 | 4.942580  | -0.981110 |
| O | -4.107010 | 3.340910  | 0.130870  |
| C | -4.938230 | 2.639180  | 1.031880  |
| H | -5.601860 | 3.376670  | 1.475420  |
| H | -5.526410 | 1.881740  | 0.508210  |
| H | -4.346350 | 2.155150  | 1.813220  |



|   |           |           |           |
|---|-----------|-----------|-----------|
| N | -0.394640 | -1.161920 | -0.393040 |
| C | -1.728080 | -0.866100 | -1.016140 |
| H | -1.626910 | -1.301690 | -2.018000 |
| C | -2.125330 | 0.146990  | 4.266930  |
| C | -1.715530 | 0.935000  | 3.200250  |
| C | -1.200090 | 0.348100  | 2.055660  |
| C | -1.093930 | -1.041970 | 1.975540  |
| C | -1.457110 | -1.828520 | 3.073210  |
| C | -1.988660 | -1.236960 | 4.202190  |
| H | -2.529200 | 0.608460  | 5.158660  |
| H | -1.785860 | 2.013770  | 3.261350  |
| H | -0.857610 | 0.959700  | 1.231520  |
| H | -1.347070 | -2.904720 | 3.016510  |
| H | -2.288230 | -1.850410 | 5.041730  |
| C | -0.485060 | -1.674900 | 0.822790  |
| H | 0.193900  | -2.505790 | 1.009920  |
| N | -2.689460 | -1.546650 | -0.180750 |
| N | -3.165300 | -2.671640 | -0.822890 |
| C | -2.412520 | -3.709950 | -1.226300 |
| H | -4.168900 | -2.778020 | -0.840970 |
| O | -1.182870 | -3.705770 | -1.144980 |
| C | -3.154800 | -4.889680 | -1.803900 |
| H | -2.833940 | -5.038510 | -2.834410 |
| H | -2.876610 | -5.779220 | -1.239620 |
| H | -4.236730 | -4.767990 | -1.780490 |

---

**3+4**

---

|   |           |           |           |
|---|-----------|-----------|-----------|
| C | 9.755670  | 0.163300  | 0.818640  |
| C | 8.576520  | 1.047460  | 0.414420  |
| H | 10.709850 | 0.713220  | 0.780170  |
| H | 9.634580  | -0.221070 | 1.845620  |
| H | 9.847990  | -0.710020 | 0.151070  |
| C | 7.228370  | 0.324540  | 0.451380  |
| H | 8.532730  | 1.931260  | 1.077210  |
| H | 8.745040  | 1.445990  | -0.602740 |

|   |           |           |           |
|---|-----------|-----------|-----------|
| C | 6.049940  | 1.207940  | 0.045030  |
| H | 7.268440  | -0.558360 | -0.213720 |
| H | 7.055450  | -0.075290 | 1.468570  |
| H | 6.004160  | 2.087600  | 0.714930  |
| H | 6.232420  | 1.613200  | -0.967460 |
| C | 4.702780  | 0.491080  | 0.055420  |
| C | 3.547490  | 1.398700  | -0.368820 |
| H | 4.503510  | 0.091660  | 1.068340  |
| H | 4.743070  | -0.377520 | -0.622840 |
| C | 2.207050  | 0.687570  | -0.377360 |
| H | 3.486630  | 2.259390  | 0.320130  |
| H | 3.755130  | 1.808640  | -1.371390 |
| H | 1.361800  | 1.395030  | -0.411760 |
| H | 2.070230  | 0.144140  | 0.570150  |
| C | 2.035550  | -0.300910 | -1.528620 |
| O | 2.848220  | -0.486450 | -2.414100 |
| N | 0.858900  | -1.020180 | -1.457090 |
| H | 0.771530  | -1.912120 | -1.951620 |
| C | -2.206120 | 0.945590  | -0.992610 |
| C | -3.250380 | 1.352560  | -0.143160 |
| C | -1.384420 | 1.914590  | -1.585770 |
| C | -3.526200 | 2.693980  | 0.031720  |
| H | -3.869920 | 0.576010  | 0.299830  |
| C | -1.644070 | 3.276250  | -1.386820 |
| H | -0.562960 | 1.606850  | -2.236420 |
| C | -2.733800 | 3.677620  | -0.611160 |
| H | -1.033930 | 4.046500  | -1.862840 |
| O | -3.059570 | 4.981730  | -0.483610 |
| H | -3.847090 | 5.026810  | 0.082540  |
| O | -4.575650 | 3.182550  | 0.757080  |
| C | -5.440260 | 2.250810  | 1.374600  |
| H | -6.215170 | 2.831780  | 1.891750  |
| H | -5.918500 | 1.588350  | 0.631840  |
| H | -4.903040 | 1.626750  | 2.110200  |

|   |           |           |           |
|---|-----------|-----------|-----------|
| N | 0.115500  | -0.837780 | -0.305150 |
| C | -2.138780 | -0.471410 | -1.352000 |
| H | -1.484860 | -0.748830 | -2.186220 |
| C | -1.771190 | -1.587820 | 4.354350  |
| C | -1.802600 | -0.459100 | 3.523330  |
| C | -1.255630 | -0.510610 | 2.242180  |
| C | -0.664610 | -1.705640 | 1.781030  |
| C | -0.656900 | -2.834380 | 2.614150  |
| C | -1.203540 | -2.778910 | 3.894320  |
| H | -2.189860 | -1.536540 | 5.362820  |
| H | -2.247860 | 0.471110  | 3.886400  |
| H | -1.260100 | 0.366280  | 1.594360  |
| H | -0.198990 | -3.759530 | 2.253350  |
| H | -1.179480 | -3.661900 | 4.537750  |
| C | 0.021070  | -1.824050 | 0.496880  |
| H | 0.481700  | -2.798120 | 0.264820  |
| N | -2.936210 | -1.305340 | -0.784850 |
| N | -3.039580 | -2.584830 | -1.280640 |
| C | -2.147830 | -3.404640 | -1.923380 |
| H | -3.968430 | -2.958970 | -1.127760 |
| O | -0.938830 | -3.227510 | -1.983280 |
| C | -2.815300 | -4.583070 | -2.613290 |
| H | -2.624650 | -4.479210 | -3.693180 |
| H | -2.343900 | -5.523200 | -2.290980 |
| H | -3.901740 | -4.640310 | -2.454820 |

---

**2-1**

---

|   |           |          |           |
|---|-----------|----------|-----------|
| C | -1.198842 | 3.574424 | 0.455830  |
| C | -1.083665 | 2.639110 | 1.476165  |
| C | -0.145132 | 1.618587 | 1.380538  |
| C | 0.687939  | 1.524144 | 0.265548  |
| C | 0.575930  | 2.474658 | -0.741128 |
| C | -0.364049 | 3.489791 | -0.650590 |
| H | -1.927261 | 4.372032 | 0.529205  |
| H | -1.722605 | 2.703971 | 2.347681  |

|   |           |           |           |
|---|-----------|-----------|-----------|
| H | -0.061839 | 0.887571  | 2.177837  |
| H | 1.254608  | 2.405191  | -1.581231 |
| H | -0.438991 | 4.225044  | -1.442005 |
| C | 1.740816  | 0.454965  | 0.146671  |
| H | 2.131214  | 0.159012  | 1.123993  |
| N | 2.603975  | 0.542568  | -0.881038 |
| N | 3.875296  | 0.067422  | -0.564227 |
| C | 4.208877  | -1.109798 | -0.031817 |
| H | 4.617679  | 0.697895  | -0.817792 |
| O | 3.389927  | -1.975662 | 0.295551  |
| C | 5.690026  | -1.324805 | 0.178266  |
| H | 5.991063  | -2.217742 | -0.368650 |
| H | 6.296659  | -0.480428 | -0.145543 |
| H | 5.868224  | -1.509098 | 1.237072  |
| C | -1.355848 | -0.465607 | -1.067343 |
| C | -2.734016 | -0.578421 | -0.980825 |
| C | -3.292418 | -1.354811 | 0.030605  |
| C | -2.472287 | -2.002388 | 0.952555  |
| C | -1.104000 | -1.880950 | 0.863317  |
| C | -0.549943 | -1.125577 | -0.155618 |
| H | -0.905713 | 0.135632  | -1.848012 |
| H | -3.353682 | -0.064413 | -1.700294 |
| H | -2.936522 | -2.600366 | 1.724838  |
| H | -0.457515 | -2.388789 | 1.569030  |
| O | -4.622603 | -1.542373 | 0.199025  |
| C | -5.494971 | -0.900291 | -0.701600 |
| H | -5.322999 | -1.237986 | -1.727528 |
| H | -6.501473 | -1.172914 | -0.396208 |
| H | -5.381875 | 0.186411  | -0.654412 |
| N | 0.853397  | -1.005268 | -0.263126 |
| H | 1.163506  | -0.970778 | -1.232844 |
| H | 1.425221  | -1.731752 | 0.178010  |

---

**ts2-2**

---

|   |           |          |          |
|---|-----------|----------|----------|
| C | -1.199670 | 3.572256 | 0.455819 |
|---|-----------|----------|----------|

---

|   |           |           |           |
|---|-----------|-----------|-----------|
| C | -1.093148 | 2.642134  | 1.482805  |
| C | -0.156747 | 1.624470  | 1.396761  |
| C | 0.681362  | 1.524195  | 0.289109  |
| C | 0.579759  | 2.462650  | -0.729342 |
| C | -0.360605 | 3.482237  | -0.645829 |
| H | -1.929208 | 4.369579  | 0.520513  |
| H | -1.739409 | 2.710608  | 2.348521  |
| H | -0.079171 | 0.891916  | 2.193212  |
| H | 1.253489  | 2.377987  | -1.572104 |
| H | -0.434942 | 4.212314  | -1.442111 |
| C | 1.653316  | 0.378251  | 0.193244  |
| H | 2.126117  | 0.186263  | 1.157976  |
| N | 2.553546  | 0.408166  | -0.927397 |
| N | 3.855671  | 0.058874  | -0.572995 |
| C | 4.215140  | -1.113391 | -0.030071 |
| H | 4.575074  | 0.719969  | -0.818223 |
| O | 3.401898  | -1.978083 | 0.297517  |
| C | 5.694242  | -1.322825 | 0.183705  |
| H | 5.994720  | -2.212810 | -0.368302 |
| H | 6.299182  | -0.476414 | -0.137733 |
| H | 5.871603  | -1.513289 | 1.241344  |
| C | -1.349760 | -0.461502 | -1.069807 |
| C | -2.729644 | -0.585255 | -0.980554 |
| C | -3.287956 | -1.361673 | 0.030837  |
| C | -2.457428 | -2.009482 | 0.944667  |
| C | -1.087151 | -1.874717 | 0.849764  |
| C | -0.525840 | -1.098645 | -0.159202 |
| H | -0.910745 | 0.145142  | -1.851796 |
| H | -3.350921 | -0.074145 | -1.700878 |
| H | -2.911800 | -2.611393 | 1.720086  |
| H | -0.442657 | -2.372844 | 1.564829  |
| O | -4.618665 | -1.548084 | 0.202630  |
| C | -5.493788 | -0.906607 | -0.697955 |
| H | -5.322504 | -1.245100 | -1.723543 |

|   |           |           |           |
|---|-----------|-----------|-----------|
| H | -6.499594 | -1.179894 | -0.390904 |
| H | -5.381039 | 0.180010  | -0.651466 |
| N | 0.892895  | -0.928737 | -0.238547 |
| H | 1.582007  | -0.688615 | -1.190012 |
| H | 1.426660  | -1.690651 | 0.188287  |

---

**2-3**

---

|   |           |           |           |
|---|-----------|-----------|-----------|
| C | -0.540061 | 3.993154  | 0.492873  |
| C | -0.641389 | 2.988151  | 1.443029  |
| C | 0.024836  | 1.784160  | 1.251798  |
| C | 0.793215  | 1.576045  | 0.114970  |
| C | 0.896750  | 2.589560  | -0.831582 |
| C | 0.232876  | 3.791899  | -0.645314 |
| H | -1.057078 | 4.932903  | 0.638438  |
| H | -1.240624 | 3.138133  | 2.331794  |
| H | -0.068758 | 0.989869  | 1.983982  |
| H | 1.502719  | 2.428403  | -1.714170 |
| H | 0.317995  | 4.576030  | -1.386833 |
| C | 1.454274  | 0.237324  | -0.118628 |
| H | 1.574506  | -0.262619 | 0.851908  |
| N | 2.799082  | 0.388463  | -0.704257 |
| N | 3.809957  | -0.215920 | 0.027853  |
| C | 3.883081  | -1.562038 | 0.188697  |
| H | 4.506923  | 0.395775  | 0.416724  |
| O | 3.051580  | -2.310417 | -0.290208 |
| C | 5.055899  | -2.062361 | 0.992433  |
| H | 5.639467  | -2.734609 | 0.365225  |
| H | 5.696000  | -1.262557 | 1.360413  |
| H | 4.674311  | -2.638641 | 1.833746  |
| C | -1.689624 | 0.040951  | -0.951568 |
| C | -3.003506 | -0.220282 | -0.581365 |
| C | -3.315793 | -1.410792 | 0.067025  |
| C | -2.304605 | -2.327024 | 0.345914  |
| C | -0.998860 | -2.045250 | -0.007911 |
| C | -0.672724 | -0.858395 | -0.665840 |

|   |           |           |           |
|---|-----------|-----------|-----------|
| H | -1.448668 | 0.960150  | -1.470114 |
| H | -3.768991 | 0.504862  | -0.816166 |
| H | -2.566038 | -3.250295 | 0.845675  |
| H | -0.210654 | -2.754354 | 0.221329  |
| O | -4.569066 | -1.765248 | 0.459460  |
| C | -5.616962 | -0.867004 | 0.183430  |
| H | -5.724809 | -0.700989 | -0.892226 |
| H | -6.523031 | -1.326534 | 0.569659  |
| H | -5.457715 | 0.094268  | 0.680429  |
| N | 0.674073  | -0.587012 | -1.049570 |
| H | 2.785900  | -0.006037 | -1.640083 |
| H | 1.182196  | -1.465752 | -1.119685 |

---

**2-4**

---

|   |           |           |           |
|---|-----------|-----------|-----------|
| C | -1.967374 | 3.413631  | 1.173421  |
| C | -1.485802 | 3.591990  | -0.117716 |
| C | -1.214696 | 2.492061  | -0.914760 |
| C | -1.417931 | 1.199496  | -0.436811 |
| C | -1.898951 | 1.025782  | 0.853677  |
| C | -2.169321 | 2.130055  | 1.654757  |
| H | -2.177465 | 4.270800  | 1.799903  |
| H | -1.316372 | 4.589842  | -0.501521 |
| H | -0.822546 | 2.626597  | -1.915526 |
| H | -2.039855 | 0.032896  | 1.260507  |
| H | -2.536028 | 1.978766  | 2.661950  |
| C | -1.130692 | 0.041106  | -1.390224 |
| H | -1.828875 | 0.159986  | -2.224178 |
| N | -1.366593 | -1.328821 | -0.905783 |
| N | -2.724522 | -1.602973 | -0.683875 |
| C | -3.128768 | -2.127042 | 0.505756  |
| H | -3.215660 | -1.907138 | -1.511054 |
| O | -2.399001 | -2.153905 | 1.478398  |
| C | -4.539700 | -2.655366 | 0.531632  |
| H | -5.090027 | -2.446285 | -0.384045 |
| H | -4.504744 | -3.731615 | 0.698651  |

|   |           |           |           |
|---|-----------|-----------|-----------|
| H | -5.056476 | -2.203334 | 1.376127  |
| C | 1.410998  | -0.059542 | 0.163175  |
| C | 2.621417  | -0.229716 | 0.835961  |
| C | 3.797722  | -0.410290 | 0.128056  |
| C | 3.752474  | -0.415192 | -1.266221 |
| C | 2.556857  | -0.238510 | -1.924623 |
| C | 1.356925  | -0.059183 | -1.223874 |
| H | 0.518449  | 0.084775  | 0.754082  |
| H | 2.614754  | -0.222207 | 1.916259  |
| H | 4.674970  | -0.556158 | -1.813832 |
| H | 2.540198  | -0.231702 | -3.008531 |
| O | 5.025266  | -0.589512 | 0.690277  |
| C | 5.096395  | -0.591495 | 2.095496  |
| H | 4.496363  | -1.400590 | 2.522273  |
| H | 6.141916  | -0.745550 | 2.349466  |
| H | 4.758775  | 0.362315  | 2.511550  |
| N | 0.183498  | 0.147860  | -1.975094 |
| H | -0.879482 | -1.533753 | -0.036380 |
| H | 0.227985  | -0.339474 | -2.858051 |

---

ts2-5

---

|   |           |           |           |
|---|-----------|-----------|-----------|
| C | -0.887743 | 3.841470  | 0.477893  |
| C | -0.099168 | 3.500020  | -0.614023 |
| C | -0.184584 | 2.232849  | -1.166815 |
| C | -1.064150 | 1.293789  | -0.634611 |
| C | -1.855970 | 1.638598  | 0.454378  |
| C | -1.763752 | 2.908644  | 1.011238  |
| H | -0.813245 | 4.829141  | 0.914224  |
| H | 0.594115  | 4.220341  | -1.028866 |
| H | 0.442213  | 1.948484  | -2.002741 |
| H | -2.537168 | 0.918243  | 0.893610  |
| H | -2.376115 | 3.164188  | 1.866435  |
| C | -1.147815 | -0.047858 | -1.315136 |
| H | -1.899318 | 0.010524  | -2.113113 |
| N | -1.739388 | -1.206930 | -0.419630 |



|   |           |           |           |
|---|-----------|-----------|-----------|
| N | -3.105349 | -1.491785 | -0.431121 |
| C | -3.782074 | -1.585747 | 0.755733  |
| H | -3.463134 | -1.874205 | -1.290845 |
| O | -3.237501 | -1.305668 | 1.800002  |
| C | -5.210329 | -2.041677 | 0.650014  |
| H | -5.568638 | -2.082670 | -0.376872 |
| H | -5.288639 | -3.030857 | 1.100972  |
| H | -5.830476 | -1.360055 | 1.228595  |
| C | 1.358618  | -0.302060 | 0.262939  |
| C | 2.607958  | -0.334444 | 0.885699  |
| C | 3.721953  | -0.769605 | 0.189097  |
| C | 3.572459  | -1.167238 | -1.140228 |
| C | 2.338731  | -1.119919 | -1.748394 |
| C | 1.183681  | -0.685639 | -1.070467 |
| H | 0.522558  | 0.049474  | 0.855295  |
| H | 2.681462  | -0.017551 | 1.916552  |
| H | 4.449218  | -1.502785 | -1.679772 |
| H | 2.225723  | -1.420011 | -2.782577 |
| O | 4.985624  | -0.843628 | 0.704726  |
| C | 5.154793  | -0.455770 | 2.043989  |
| H | 4.556909  | -1.077778 | 2.717666  |
| H | 6.209574  | -0.589131 | 2.272845  |
| H | 4.881833  | 0.593780  | 2.193678  |
| N | -0.018874 | -0.747662 | -1.787925 |
| H | -1.459114 | -1.128544 | 0.564433  |
| H | -0.923103 | -1.764043 | -1.064440 |

---

**5+6**

---

|   |           |           |           |
|---|-----------|-----------|-----------|
| C | -4.131797 | 1.789200  | 1.064583  |
| C | -3.160561 | 2.330511  | 0.230398  |
| C | -2.391929 | 1.504431  | -0.572691 |
| C | -2.597842 | 0.125257  | -0.556435 |
| C | -3.591552 | -0.408126 | 0.260676  |
| C | -4.346111 | 0.418314  | 1.080107  |
| H | -4.725801 | 2.437707  | 1.695432  |

|   |           |           |           |
|---|-----------|-----------|-----------|
| H | -3.002534 | 3.400784  | 0.206542  |
| H | -1.632774 | 1.926368  | -1.218328 |
| H | -3.754060 | -1.479532 | 0.262010  |
| H | -5.105719 | -0.005996 | 1.723507  |
| C | -1.838657 | -0.802390 | -1.428309 |
| H | -2.430023 | -1.624668 | -1.833619 |
| N | -0.783342 | -3.007513 | 0.763417  |
| N | 0.371912  | -2.977622 | -0.035370 |
| C | 1.560434  | -2.629216 | 0.539668  |
| H | 0.197181  | -2.640133 | -0.974129 |
| O | 1.697932  | -2.575022 | 1.746439  |
| C | 2.667199  | -2.308068 | -0.430002 |
| H | 2.391950  | -2.515673 | -1.462851 |
| H | 2.906673  | -1.247640 | -0.331749 |
| H | 3.549001  | -2.885407 | -0.157901 |
| C | 0.457245  | 0.261245  | 0.168288  |
| C | 1.478707  | 1.031118  | 0.709055  |
| C | 2.369394  | 1.685918  | -0.136042 |
| C | 2.237321  | 1.543712  | -1.518378 |
| C | 1.237405  | 0.751083  | -2.044332 |
| C | 0.319633  | 0.115113  | -1.206608 |
| H | -0.228845 | -0.254869 | 0.828869  |
| H | 1.574377  | 1.093026  | 1.783023  |
| H | 2.948315  | 2.048727  | -2.158585 |
| H | 1.153441  | 0.609239  | -3.114207 |
| O | 3.398447  | 2.461025  | 0.288196  |
| C | 3.589221  | 2.588602  | 1.679481  |
| H | 3.778967  | 1.616627  | 2.142779  |
| H | 4.457799  | 3.228276  | 1.809830  |
| H | 2.721475  | 3.052341  | 2.156533  |
| N | -0.619179 | -0.775090 | -1.774380 |
| H | -0.962171 | -3.973196 | 1.020589  |
| H | -0.542688 | -2.532648 | 1.632751  |

---

2+5

---

|   |           |           |           |
|---|-----------|-----------|-----------|
| C | 0.603455  | -0.153848 | 0.000074  |
| O | 1.547187  | -0.913091 | -0.000150 |
| N | -0.672395 | -0.647963 | 0.000293  |
| H | -0.757121 | -1.655313 | -0.000117 |
| C | 0.740276  | 1.346535  | 0.000074  |
| H | 0.254834  | 1.774790  | -0.875927 |
| H | 0.253182  | 1.775073  | 0.874997  |
| H | 1.799567  | 1.583646  | 0.000890  |
| N | -1.795406 | 0.169475  | -0.000100 |
| H | -2.357450 | 0.010136  | -0.826918 |
| H | -2.358288 | 0.009692  | 0.826044  |

**ts2-6**

|   |           |           |           |
|---|-----------|-----------|-----------|
| C | 9.045419  | 0.507066  | 1.524562  |
| C | 8.031563  | 0.875695  | 0.440365  |
| H | 10.039093 | 0.934871  | 1.314774  |
| H | 8.726833  | 0.876230  | 2.514184  |
| H | 9.164916  | -0.586531 | 1.606013  |
| C | 6.632701  | 0.301611  | 0.685602  |
| H | 7.962973  | 1.976089  | 0.358361  |
| H | 8.399277  | 0.526321  | -0.541794 |
| C | 5.611080  | 0.665836  | -0.395455 |
| H | 6.699522  | -0.799447 | 0.765861  |
| H | 6.264339  | 0.649967  | 1.669260  |
| H | 5.543157  | 1.767581  | -0.476117 |
| H | 5.981137  | 0.316680  | -1.377235 |
| C | 4.216074  | 0.084184  | -0.150701 |
| C | 3.199258  | 0.452572  | -1.236393 |
| H | 3.843489  | 0.432839  | 0.831823  |
| H | 4.283565  | -1.014391 | -0.087998 |
| C | 1.797492  | -0.112176 | -0.999795 |
| H | 3.128231  | 1.552596  | -1.310031 |
| H | 3.567434  | 0.092777  | -2.211487 |
| H | 1.062869  | 0.372116  | -1.666220 |
| H | 1.437762  | 0.104271  | 0.020291  |

|   |           |           |           |
|---|-----------|-----------|-----------|
| C | 1.707175  | -1.617240 | -1.224915 |
| O | 2.637929  | -2.290336 | -1.646449 |
| N | 0.496367  | -2.203900 | -0.952946 |
| H | 0.540314  | -3.224142 | -0.993397 |
| C | -2.439142 | -0.087456 | -0.975328 |
| C | -2.066877 | 0.882863  | -0.024500 |
| C | -3.502724 | 0.178546  | -1.848505 |
| C | -2.759612 | 2.086691  | 0.046875  |
| H | -1.215258 | 0.664472  | 0.619419  |
| C | -4.199519 | 1.389307  | -1.780287 |
| H | -3.784109 | -0.558430 | -2.607004 |
| C | -3.839476 | 2.348286  | -0.833878 |
| H | -5.023432 | 1.613525  | -2.460480 |
| O | -4.495285 | 3.523242  | -0.756496 |
| H | -4.085784 | 4.034679  | -0.039219 |
| O | -2.501343 | 3.112438  | 0.908592  |
| C | -1.450510 | 2.978884  | 1.844588  |
| H | -1.427439 | 3.909094  | 2.427217  |
| H | -1.625001 | 2.128573  | 2.526677  |
| H | -0.477372 | 2.841361  | 1.342047  |
| N | -0.553198 | -1.585311 | -0.265333 |
| C | -1.706222 | -1.387178 | -1.045049 |
| H | -1.682756 | -1.808603 | -2.065468 |
| C | -3.947555 | -1.840682 | 1.830171  |
| O | -4.976024 | -1.330500 | 2.216521  |
| N | -3.849482 | -2.254074 | 0.501304  |
| H | -4.586608 | -1.890146 | -0.102869 |
| C | -2.757126 | -2.125469 | 2.722902  |
| H | -2.488702 | -3.193702 | 2.699614  |
| H | -1.869881 | -1.556307 | 2.403588  |
| H | -3.028970 | -1.838874 | 3.745577  |
| N | -2.639234 | -2.538338 | -0.129190 |
| H | -1.583714 | -2.430371 | 0.397543  |
| H | -2.701276 | -3.428527 | -0.638673 |

---

|   |           |           |           |
|---|-----------|-----------|-----------|
| C | 4.456350  | -0.987215 | 1.810220  |
| O | 4.659744  | -0.503353 | 2.900720  |
| N | 3.413723  | -1.870170 | 1.647730  |
| H | 2.784156  | -1.922648 | 2.442129  |
| C | 5.298788  | -0.678622 | 0.602287  |
| H | 5.332704  | -1.506246 | -0.100816 |
| H | 4.860639  | 0.181734  | 0.091268  |
| H | 6.291934  | -0.409057 | 0.951200  |
| N | 2.969880  | -2.311542 | 0.409539  |
| H | 2.819166  | -3.313941 | 0.456624  |
| C | 1.748879  | -1.623275 | -0.022274 |
| H | 1.017349  | -1.582759 | 0.799447  |
| C | 2.083153  | -0.219495 | -0.460001 |
| C | 1.857423  | 0.850811  | 0.392070  |
| C | 2.687289  | 0.008737  | -1.690146 |
| C | 2.235628  | 2.143727  | 0.050811  |
| H | 1.390002  | 0.705287  | 1.359016  |
| C | 3.067980  | 1.291645  | -2.044417 |
| H | 2.876994  | -0.825207 | -2.353301 |
| C | 2.865157  | 2.360882  | -1.178874 |
| H | 3.554163  | 1.473942  | -2.997078 |
| N | 1.215719  | -2.404810 | -1.142111 |
| H | 1.100304  | -3.369835 | -0.839908 |
| N | -0.057758 | -1.957505 | -1.485395 |
| C | -1.153616 | -2.362412 | -0.788274 |
| H | -0.130564 | -1.425976 | -2.335742 |
| O | -1.050128 | -3.099772 | 0.173075  |
| C | -2.479938 | -1.840396 | -1.286887 |
| C | -3.253705 | -1.158044 | -0.160930 |
| H | -3.047154 | -2.699899 | -1.653336 |
| H | -2.338931 | -1.155343 | -2.126213 |
| C | -4.631731 | -0.686412 | -0.604803 |
| H | -3.343826 | -1.860467 | 0.669965  |

|   |           |           |           |
|---|-----------|-----------|-----------|
| H | -2.674649 | -0.306394 | 0.209497  |
| C | -5.411579 | -0.004592 | 0.512371  |
| H | -4.529891 | 0.004566  | -1.448700 |
| H | -5.204656 | -1.542608 | -0.976601 |
| H | -5.514600 | -0.696618 | 1.354599  |
| H | -4.836401 | 0.848848  | 0.886740  |
| C | -6.791837 | 0.469853  | 0.076410  |
| C | -7.574349 | 1.149348  | 1.193544  |
| H | -7.366959 | -0.383163 | -0.299852 |
| H | -6.688592 | 1.163286  | -0.765421 |
| H | -7.678033 | 0.454880  | 2.032297  |
| H | -6.997922 | 1.999641  | 1.569608  |
| C | -8.950986 | 1.620459  | 0.743092  |
| H | -9.552051 | 0.781014  | 0.388205  |
| H | -9.496314 | 2.102783  | 1.554597  |
| H | -8.867699 | 2.336792  | -0.076589 |
| O | 3.271041  | 3.626276  | -1.477475 |
| H | 3.713930  | 3.626381  | -2.331559 |
| O | 2.021181  | 3.129910  | 0.958762  |
| C | 1.411232  | 4.331103  | 0.502956  |
| H | 0.904913  | 4.758876  | 1.365649  |
| H | 2.152412  | 5.030591  | 0.121860  |
| H | 0.679082  | 4.118631  | -0.279521 |

---

**ts2-8**

---

|   |           |           |           |
|---|-----------|-----------|-----------|
| C | -0.953004 | -2.044688 | -1.025177 |
| C | -0.358733 | -1.431307 | -2.125973 |
| C | 0.905193  | -0.839347 | -1.998066 |
| C | 1.588572  | -0.867624 | -0.777533 |
| C | 1.005194  | -1.516144 | 0.325046  |
| C | -0.255697 | -2.089659 | 0.206735  |
| H | -0.902091 | -1.418897 | -3.073124 |
| H | 1.360244  | -0.356314 | -2.868290 |
| H | 1.570924  | -1.540306 | 1.255590  |
| O | -2.193356 | -2.583107 | -1.112270 |

|   |           |           |           |
|---|-----------|-----------|-----------|
| H | -2.400337 | -2.955284 | -0.239119 |
| O | -0.946618 | -2.714848 | 1.206210  |
| C | -0.403138 | -2.708204 | 2.513292  |
| H | -1.143004 | -3.193537 | 3.163695  |
| H | 0.543608  | -3.274086 | 2.558861  |
| H | -0.220768 | -1.678476 | 2.865496  |
| C | 2.908574  | -0.158611 | -0.611835 |
| H | 3.453298  | -0.107602 | -1.567956 |
| N | 3.692541  | -0.516662 | 0.533768  |
| N | 5.064153  | -0.551780 | 0.284489  |
| C | 5.813444  | 0.484234  | -0.154659 |
| H | 5.541954  | -1.396927 | 0.582818  |
| O | 5.334368  | 1.569155  | -0.513273 |
| C | 7.309134  | 0.238450  | -0.219867 |
| H | 7.608848  | -0.758090 | 0.136845  |
| H | 7.651064  | 0.367370  | -1.258349 |
| H | 7.816522  | 1.006155  | 0.384339  |
| C | -8.234012 | 0.426286  | -0.502866 |
| C | -6.833498 | 0.030099  | -0.033258 |
| H | -8.955651 | -0.394980 | -0.365847 |
| H | -8.612719 | 1.298453  | 0.056383  |
| H | -8.236896 | 0.696011  | -1.572489 |
| C | -5.792317 | 1.140877  | -0.203797 |
| H | -6.872270 | -0.270050 | 1.029947  |
| H | -6.498728 | -0.867028 | -0.585187 |
| C | -4.387071 | 0.750693  | 0.262024  |
| H | -5.753619 | 1.441754  | -1.267663 |
| H | -6.124968 | 2.039803  | 0.348704  |
| H | -4.426353 | 0.445111  | 1.324324  |
| H | -4.048259 | -0.143860 | -0.292962 |
| C | -3.346448 | 1.864596  | 0.101441  |
| C | -1.940513 | 1.423422  | 0.510580  |
| H | -3.651103 | 2.745872  | 0.696322  |
| H | -3.334040 | 2.201744  | -0.952015 |

|   |           |          |           |
|---|-----------|----------|-----------|
| C | -0.865884 | 2.510156 | 0.354339  |
| H | -1.937049 | 1.088177 | 1.560935  |
| H | -1.648364 | 0.546015 | -0.090617 |
| H | -0.860287 | 2.905701 | -0.675451 |
| H | -1.085432 | 3.357872 | 1.025424  |
| C | 0.498742  | 1.962362 | 0.742939  |
| O | 0.743511  | 1.499301 | 1.838017  |
| N | 1.447803  | 2.024712 | -0.262858 |
| H | 1.166216  | 2.263622 | -1.208935 |
| N | 2.648660  | 1.337335 | -0.121101 |
| H | 3.493280  | 1.866274 | -0.415929 |
| H | 3.079402  | 0.812713 | 0.874510  |

---

**6+7**

---

|   |           |           |           |
|---|-----------|-----------|-----------|
| C | -7.180374 | -0.474866 | -0.264783 |
| C | -6.379315 | -1.573562 | 0.005754  |
| C | -5.004755 | -1.416590 | 0.116351  |
| C | -4.419419 | -0.162928 | -0.042045 |
| C | -5.232700 | 0.938784  | -0.314062 |
| C | -6.602229 | 0.781251  | -0.424201 |
| H | -8.252705 | -0.592966 | -0.351707 |
| H | -6.822792 | -2.552716 | 0.131001  |
| H | -4.374998 | -2.272856 | 0.327828  |
| H | -4.773124 | 1.910481  | -0.435938 |
| H | -7.227377 | 1.639362  | -0.635218 |
| C | -2.959081 | -0.049589 | 0.084078  |
| H | -2.400701 | -0.953257 | 0.298203  |
| N | -2.404562 | 1.089176  | -0.060443 |
| N | -1.055886 | 1.242726  | 0.048712  |
| C | -0.080966 | 0.338362  | 0.378854  |
| H | -0.775898 | 2.197544  | -0.094724 |
| O | -0.294649 | -0.836651 | 0.585046  |
| C | 1.305126  | 0.946975  | 0.492575  |
| C | 2.388947  | -0.018361 | 0.030952  |
| H | 1.455779  | 1.192877  | 1.548822  |



|   |          |           |           |
|---|----------|-----------|-----------|
| H | 1.363478 | 1.886379  | -0.062797 |
| C | 3.790628 | 0.536432  | 0.246742  |
| H | 2.267202 | -0.960012 | 0.568983  |
| H | 2.240959 | -0.247441 | -1.028321 |
| C | 4.883020 | -0.419499 | -0.215792 |
| H | 3.896537 | 1.489304  | -0.283412 |
| H | 3.932168 | 0.760168  | 1.309681  |
| H | 4.774998 | -1.372866 | 0.311791  |
| H | 4.743335 | -0.641361 | -1.279084 |
| C | 6.288574 | 0.124156  | 0.005652  |
| C | 7.382414 | -0.830319 | -0.457501 |
| H | 6.428911 | 0.344829  | 1.069448  |
| H | 6.396113 | 1.078969  | -0.520647 |
| C | 8.781934 | -0.274348 | -0.228829 |
| H | 7.273246 | -1.783198 | 0.068543  |
| H | 7.241260 | -1.049251 | -1.519974 |
| H | 9.551000 | -0.969528 | -0.566309 |
| H | 8.919696 | 0.665052  | -0.767817 |
| H | 8.952415 | -0.074995 | 0.830935  |

---

**ts2-9**

---

|   |          |           |           |
|---|----------|-----------|-----------|
| C | 3.998789 | -0.516166 | -0.313333 |
| C | 4.893459 | -1.270153 | -1.109907 |
| C | 6.247391 | -1.394997 | -0.794362 |
| C | 6.772553 | -0.764539 | 0.344827  |
| C | 5.910180 | -0.003057 | 1.143386  |
| C | 4.559659 | 0.127604  | 0.822269  |
| H | 4.496755 | -1.770435 | -1.997299 |
| H | 6.884801 | -1.993420 | -1.447410 |
| H | 6.325758 | 0.500082  | 2.020103  |
| H | 3.933454 | 0.763826  | 1.452903  |
| O | 8.084401 | -0.826548 | 0.741365  |
| C | 8.989685 | -1.558323 | -0.039912 |
| H | 9.972593 | -1.472735 | 0.445543  |
| H | 8.719852 | -2.630367 | -0.102604 |

|   |            |           |           |
|---|------------|-----------|-----------|
| H | 9.069515   | -1.162857 | -1.071026 |
| C | 1.179244   | 1.453993  | 0.105129  |
| C | 1.461826   | 2.207672  | -1.042924 |
| C | 0.412903   | 2.028898  | 1.131229  |
| C | 0.974727   | 3.512338  | -1.168169 |
| H | 2.087215   | 1.749740  | -1.813730 |
| C | -0.072606  | 3.333730  | 1.007939  |
| H | 0.203857   | 1.452203  | 2.038135  |
| C | 0.205248   | 4.076654  | -0.145110 |
| H | 1.206883   | 4.096783  | -2.062508 |
| H | -0.661181  | 3.776166  | 1.816041  |
| H | -0.167718  | 5.099852  | -0.239783 |
| C | 1.691339   | 0.027481  | 0.220517  |
| H | 1.838446   | -0.219650 | 1.295057  |
| N | 2.672777   | -0.437869 | -0.676310 |
| C | -10.737295 | -0.370424 | 0.014980  |
| C | -9.429402  | -1.128105 | 0.247379  |
| H | -11.613693 | -0.987613 | 0.269322  |
| H | -10.785588 | 0.544451  | 0.629287  |
| H | -10.841521 | -0.063736 | -1.039440 |
| C | -8.179071  | -0.311087 | -0.093034 |
| H | -9.373474  | -1.453260 | 1.302294  |
| H | -9.429476  | -2.057121 | -0.351569 |
| C | -6.865017  | -1.062380 | 0.138468  |
| H | -8.232974  | 0.014172  | -1.149044 |
| H | -8.178293  | 0.619131  | 0.505689  |
| H | -6.810016  | -1.387620 | 1.193784  |
| H | -6.864887  | -1.991862 | -0.460622 |
| C | -5.615966  | -0.243690 | -0.200567 |
| C | -4.307058  | -0.998919 | 0.042849  |
| H | -5.616429  | 0.687517  | 0.396336  |
| H | -5.666645  | 0.078892  | -1.257411 |
| C | -3.064831  | -0.172060 | -0.296993 |
| H | -4.238431  | -1.314197 | 1.096543  |

|   |           |           |           |
|---|-----------|-----------|-----------|
| H | -4.297167 | -1.929875 | -0.550934 |
| H | -3.050556 | 0.107770  | -1.364232 |
| H | -3.078632 | 0.778753  | 0.268296  |
| C | -1.769142 | -0.865841 | 0.071889  |
| O | -1.638788 | -1.645823 | 0.997863  |
| N | -0.689259 | -0.564433 | -0.737533 |
| H | -0.691266 | 0.225149  | -1.374873 |
| N | 0.575293  | -0.990519 | -0.327455 |
| H | 0.398896  | -1.737159 | 0.362195  |
| H | 1.443651  | -1.245622 | -1.053076 |

---

**2-10**

---

|   |           |           |           |
|---|-----------|-----------|-----------|
| C | -1.195668 | -2.139319 | -0.505989 |
| C | -0.474795 | -2.130473 | -1.700942 |
| C | 0.821445  | -1.601454 | -1.708225 |
| C | 1.396291  | -1.093064 | -0.536809 |
| C | 0.682724  | -1.122077 | 0.675449  |
| C | -0.607065 | -1.639076 | 0.688013  |
| H | -0.929043 | -2.531504 | -2.605738 |
| H | 1.382170  | -1.600038 | -2.642677 |
| H | 1.158427  | -0.752167 | 1.589154  |
| O | -2.475488 | -2.628086 | -0.538196 |
| H | -2.886198 | -2.599233 | 0.374050  |
| O | -1.436829 | -1.750712 | 1.792061  |
| C | -1.191254 | -0.809352 | 2.868504  |
| H | -2.019170 | -1.024418 | 3.554089  |
| H | -0.224963 | -1.017640 | 3.338698  |
| H | -1.241869 | 0.220448  | 2.480780  |
| C | 2.779297  | -0.499478 | -0.599060 |
| H | 3.361464  | -0.885110 | -1.468285 |
| N | 3.467129  | -0.439475 | 0.694390  |
| N | 4.834814  | -0.713772 | 0.640472  |
| C | 5.741751  | 0.012601  | -0.129068 |
| H | 5.134406  | -1.308647 | 1.414388  |
| O | 5.353242  | 0.796045  | -0.996395 |

|   |           |           |           |
|---|-----------|-----------|-----------|
| C | 7.193638  | -0.281751 | 0.116335  |
| H | 7.434968  | -1.346165 | 0.001767  |
| H | 7.813725  | 0.270128  | -0.610119 |
| H | 7.515521  | 0.035129  | 1.117105  |
| C | -7.794185 | 0.107521  | -0.480996 |
| C | -6.333425 | -0.237840 | -0.200941 |
| H | -8.434961 | -0.776404 | -0.385600 |
| H | -8.172332 | 0.863379  | 0.216533  |
| H | -7.928989 | 0.500945  | -1.495041 |
| C | -5.424243 | 0.992434  | -0.331995 |
| H | -6.240154 | -0.669446 | 0.814603  |
| H | -5.996697 | -1.030069 | -0.898798 |
| C | -3.958403 | 0.637574  | -0.052546 |
| H | -5.522752 | 1.422348  | -1.347491 |
| H | -5.762681 | 1.784340  | 0.363324  |
| H | -3.861088 | 0.210518  | 0.964384  |
| H | -3.625672 | -0.163092 | -0.745030 |
| C | -3.047577 | 1.865694  | -0.193245 |
| C | -1.583861 | 1.485086  | 0.053754  |
| H | -3.363600 | 2.654279  | 0.516668  |
| H | -3.162064 | 2.305843  | -1.202802 |
| C | -0.644260 | 2.688312  | -0.084690 |
| H | -1.477173 | 1.045802  | 1.074608  |
| H | -1.285109 | 0.682956  | -0.652069 |
| H | -0.741094 | 3.156201  | -1.084487 |
| H | -0.927923 | 3.484768  | 0.638638  |
| C | 0.778353  | 2.263258  | 0.205386  |
| O | 1.339037  | 2.399499  | 1.272198  |
| N | 1.477868  | 1.746982  | -0.931768 |
| H | 0.924923  | 1.320487  | -1.688288 |
| N | 2.704846  | 1.078208  | -0.647773 |
| H | 3.464807  | 1.480736  | -1.258211 |
| H | 3.148241  | 1.036485  | 0.603650  |

---

**ts2-11**

---

---

|   |           |           |           |
|---|-----------|-----------|-----------|
| C | -0.953004 | -2.044688 | -1.025177 |
| C | -0.358733 | -1.431307 | -2.125973 |
| C | 0.905193  | -0.839347 | -1.998066 |
| C | 1.588572  | -0.867624 | -0.777533 |
| C | 1.005194  | -1.516144 | 0.325046  |
| C | -0.255697 | -2.089659 | 0.206735  |
| H | -0.902091 | -1.418897 | -3.073124 |
| H | 1.360244  | -0.356314 | -2.868290 |
| H | 1.570924  | -1.540306 | 1.255590  |
| O | -2.193356 | -2.583107 | -1.112270 |
| H | -2.400337 | -2.955284 | -0.239119 |
| O | -0.946618 | -2.714848 | 1.206210  |
| C | -0.403138 | -2.708204 | 2.513292  |
| H | -1.143004 | -3.193537 | 3.163695  |
| H | 0.543608  | -3.274086 | 2.558861  |
| H | -0.220768 | -1.678476 | 2.865496  |
| C | 2.908574  | -0.158611 | -0.611835 |
| H | 3.453298  | -0.107602 | -1.567956 |
| N | 3.692541  | -0.516662 | 0.533768  |
| N | 5.064153  | -0.551780 | 0.284489  |
| C | 5.813444  | 0.484234  | -0.154659 |
| H | 5.541954  | -1.396927 | 0.582818  |
| O | 5.334368  | 1.569155  | -0.513273 |
| C | 7.309134  | 0.238450  | -0.219867 |
| H | 7.608848  | -0.758090 | 0.136845  |
| H | 7.651064  | 0.367370  | -1.258349 |
| H | 7.816522  | 1.006155  | 0.384339  |
| C | -8.234012 | 0.426286  | -0.502866 |
| C | -6.833498 | 0.030099  | -0.033258 |
| H | -8.955651 | -0.394980 | -0.365847 |
| H | -8.612719 | 1.298453  | 0.056383  |
| H | -8.236896 | 0.696011  | -1.572489 |
| C | -5.792317 | 1.140877  | -0.203797 |
| H | -6.872270 | -0.270050 | 1.029947  |

|   |           |           |           |
|---|-----------|-----------|-----------|
| H | -6.498728 | -0.867028 | -0.585187 |
| C | -4.387071 | 0.750693  | 0.262024  |
| H | -5.753619 | 1.441754  | -1.267663 |
| H | -6.124968 | 2.039803  | 0.348704  |
| H | -4.426353 | 0.445111  | 1.324324  |
| H | -4.048259 | -0.143860 | -0.292962 |
| C | -3.346448 | 1.864596  | 0.101441  |
| C | -1.940513 | 1.423422  | 0.510580  |
| H | -3.651103 | 2.745872  | 0.696322  |
| H | -3.334040 | 2.201744  | -0.952015 |
| C | -0.865884 | 2.510156  | 0.354339  |
| H | -1.937049 | 1.088177  | 1.560935  |
| H | -1.648364 | 0.546015  | -0.090617 |
| H | -0.860287 | 2.905701  | -0.675451 |
| H | -1.085432 | 3.357872  | 1.025424  |
| C | 0.498742  | 1.962362  | 0.742939  |
| O | 0.743511  | 1.499301  | 1.838017  |
| N | 1.447803  | 2.024712  | -0.262858 |
| H | 1.166216  | 2.263622  | -1.208935 |
| N | 2.648660  | 1.337335  | -0.121101 |
| H | 3.493280  | 1.866274  | -0.415929 |
| H | 3.079402  | 0.812713  | 0.874510  |

---
